# Supplementary material for: Cercosporin-photocatalyzed sp3 (C–H) activation for the synthesis of pyrrolo[3,4-c]quinolones
Source: Royal Society of Chemistry journal article supplement (doi:10.1039/c9ob01946d), 2019-01-01

## Supporting information

### **Cercosporin-photocatalyzed $\text{sp}^3$ (C-H) Activation for the Synthesis of Pyrrolo[3,4-*c*]quinolones**

Jia Li,<sup>a</sup> Wenhao Bao,<sup>a</sup> Yan Zhang<sup>\*b</sup> and Yijian Rao<sup>\*a</sup>

<sup>a</sup>Key Laboratory of Carbohydrate Chemistry and Biotechnology, Ministry of Education, School of Biotechnology, Jiangnan University, Wuxi 214122, P. R. China

<sup>b</sup>School of Pharmaceutical Science, Jiangnan University, Wuxi 214122, P. R. China

### **Table of Contents**

|                                                                          |     |
|--------------------------------------------------------------------------|-----|
| 1. General Methods.....                                                  | S2  |
| 2. General Procedure for the Synthesis of Products.....                  | S2  |
| 3. Spectroscopic Investigation of the Mechanism.....                     | S3  |
| 4. Isotope Effects Experiments.....                                      | S4  |
| 5. Characterization Data for All Compounds.....                          | S8  |
| 6. References. ....                                                      | S22 |
| 7. Copies of $^1\text{H}$ NMR, $^{13}\text{C}$ NMR and HRMS Spectra..... | S23 |

## 1. General Methods.

Cercosporin was biosynthesized by a cercosporin producing strain in our laboratory.<sup>1</sup> All other commercially available reagents and solvents were used without further purification. Thin-layer chromatography was performed using silica gel plates F254. <sup>1</sup>H and <sup>13</sup>C NMR spectra were recorded on Bruker AV400 (400 MHz) spectrometer in CDCl<sub>3</sub> solutions with internal solvent signals (for <sup>1</sup>H and <sup>13</sup>C) as reference (7.26 ppm and 77.2 ppm, respectively). <sup>1</sup>H NMR data are reported as follows: chemical shift (ppm), multiplicity (s = singlet, d = doublet, dd = doublet of doublets, t = triplet, m = multiplet), coupling constants (Hz), and numbers of protons. Data for <sup>13</sup>C NMR are reported in terms of chemical shift and no special nomenclature is used for equivalent carbons. UV-Vis and fluorescence measurements were performed with Shimadzu UV-3600plus spectrophotometer and F-2700 spectrofluorometer. High resolution mass spectra (HRMS) were recorded on Waters Xevo G2 Q-TOF instrument. All the reactions were carried out in 10 mL borosilicate Schlenk tubes with the irradiation of a PHILIPS 15 W white CFL (13.7 mW/cm<sup>2</sup>)<sup>1a</sup> at room temperature.

## 2. General Procedures for the Synthesis of Products

A 10 mL schlenk tube was added tertiary aniline **1** (0.25 mmol, 67.5 mg, 1.0 equiv.), maleimide **2** (0.25 mmol, 43.25 mg, 1.0 equiv.), cercosporin (0.0025 mmol, 1.36 mg, 0.01 equiv.) and CH<sub>3</sub>CN (2 mL). The solution was irradiated under stirring with a 15 W household fluorescent lamps (distance app. 4 cm) at room temperature. After the reaction was complete after 20 h, the solvent was removed under reduced pressure, and

the residual was treated with silica gel chromatography using hexane/EtOAc = 10:1 as eluent to give desired product(s). Compounds **3** could be further purified by recrystallization from CH<sub>2</sub>Cl<sub>2</sub> and hexane.

### 3. Spectroscopic Investigation of the Mechanism

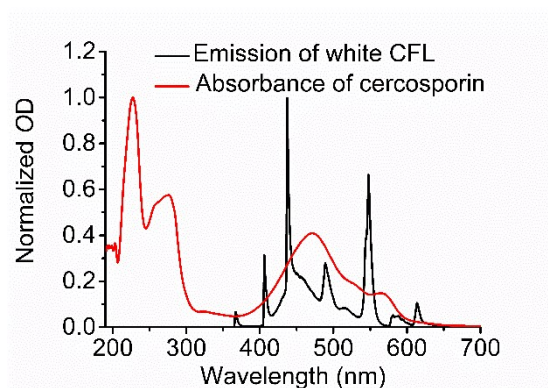

Figure S1. (Left)

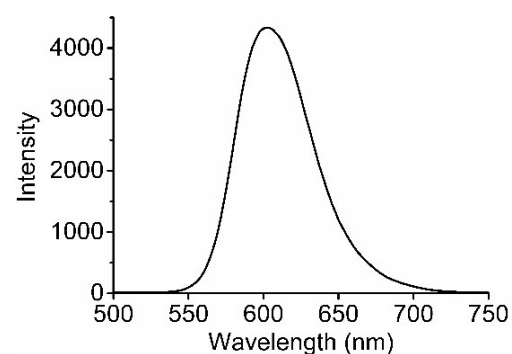

Normalized absorption of cercosporin and emission of white CFL; (Right) emission spectra of cercosporin at 298K in CH<sub>3</sub>CN solution.

**3.1 Procedures for quenching experiments.** In a typical experiment, an appropriate amount of quencher was added to a solution of cercosporin in degassed CH<sub>3</sub>CN in a quartz cuvette (The concentration of cercosporin was controlled at  $1.565 \times 10^{-5}$  M). After stirring and irradiation by 15 w CFL for 2 minutes, the emission and absorption spectra of the sample were collected. For the emission spectra, all cercosporin solutions were excited at 425 nm and the emission intensity at 597 nm was observed.

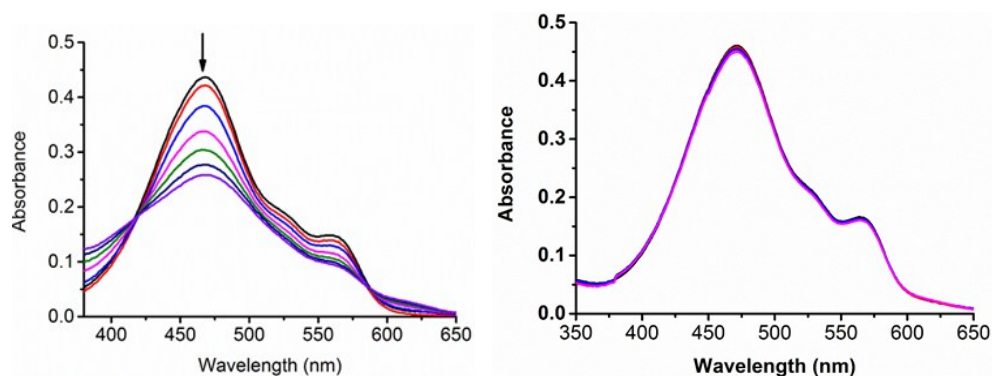

Figure S2. Titration of **1a** (Left) and **2a** (Right) to cercosporin in degassed CH<sub>3</sub>CN with

excitation at 425 nm.

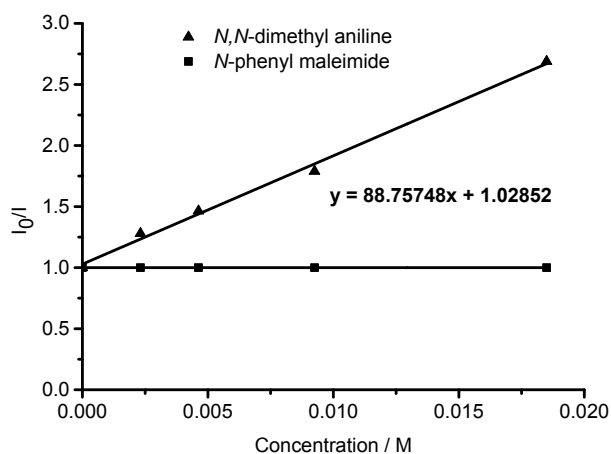

**Figure S3.** Stern-Volmer plots for the cercosporin emission quenching by *N,N*-dimethylaniline and *N*-phenylmaleimide.

#### 4. Isotope Effects Experiments.

**4.1 Procedure for the synthesis of isotope substracts.** *N,N*-Di(trideuteriomethyl) aniline and *N*-methyl-*N*-trideuteriomethyl aniline were prepared using a modified procedure according to literature<sup>2</sup>.

*N*-methyl-*N*-trideuteriomethyl aniline (**D<sub>3</sub>-1a**). To a solution of benzene (4.2 mL), water (0.6 mL), *N*-methylaniline (322 mg, 3 mmol), tetra-*n*-butylammonium iodide (39 mg, 0.11 mmol) and potassium hydroxide (210 mg, 3.75 mmol) was added iodomethane-*d*<sub>3</sub> (544 mg, 3.75 mmol) dropwise at room temperature. Then the reaction mixture was heated at 90 °C for 24 h before it was cooled to RT. The organic layer was extracted with diethyl ether and washed with water, saturated sodium carbonate, and dried over Na<sub>2</sub>SO<sub>4</sub>. The solution was filtrated, concentrated and eluted through a silica gel column (petroleum ether/ethyl acetate 20:1) to give compound **D<sub>3</sub>-1a** in about 90%

yield.  $^1\text{H}$  NMR (400 MHz,  $\text{CDCl}_3$ ):  $\delta$  7.22-7.26 (t,  $J$  = 7.6 Hz, 2H), 6.70-6.75 (m, 3H), 2.94 (s, 3H) ppm.

*N,N*-di(trideuteriomethyl) aniline (**D<sub>6</sub>-1a**). To a solution of benzene (4.2 mL), water (0.6 mL), aniline (279 mg, 3 mmol), *tetra-n*-butylammonium iodide (78 mg, 0.21 mmol) and potassium hydroxide (421 mg, 7.5 mmol), was added iodomethane-*d*3 (1088 mg, 7.5 mmol) dropwise at room temperature. Then the reaction mixture was heated at 90 °C for 24 h before it was cooled to RT. The organic layer was extracted with diethyl ether and washed with water, saturated sodium carbonate, and dried over  $\text{Na}_2\text{SO}_4$ . The solution was concentrated and eluted through a silica gel column (petroleum ether/ethyl acetate 20:1) to give compound **D<sub>6</sub>-1a** in about 70% yield.  $^1\text{H}$  NMR (400 MHz,  $\text{CDCl}_3$ ):  $\delta$  7.22-7.25 (m, 2H), 6.70-6.75 (m, 3H) ppm.

**4.2 Intermolecular deuterium isotope effects.** To a 10 mL round bottom flask was added 0.1 mmol of *N,N*-di(trideuteriomethyl) aniline, 0.1 mmol of *N,N*-dimethyl aniline, 0.1 mmol of *N*-phenyl maleimide, 1.0 mg (0.0018 mmol) of cercosporin and  $\text{CH}_3\text{CN}$  (1.0 mL). The solution was irradiated under stirring with 15 W household fluorescent lamps (distance app. 4 cm) at room temperature for 4 hours.  $k_{\text{H}}/k_{\text{D}}$  (inter) was determined to be 5.25 by the relative intensity of  $^1\text{H}$  NMR signals of C(2)H<sub>2</sub> ( $\delta$ 3.62 and 3.13) with C(3)H and C(4)H ( $\delta$ 3.56 and 4.16 respectively).

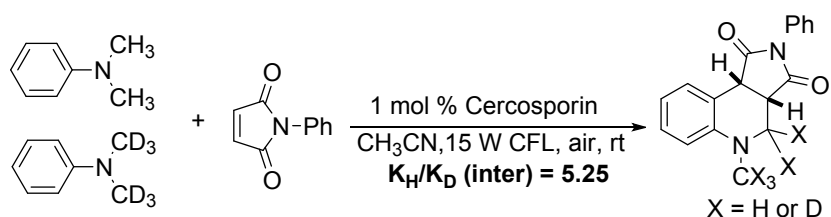

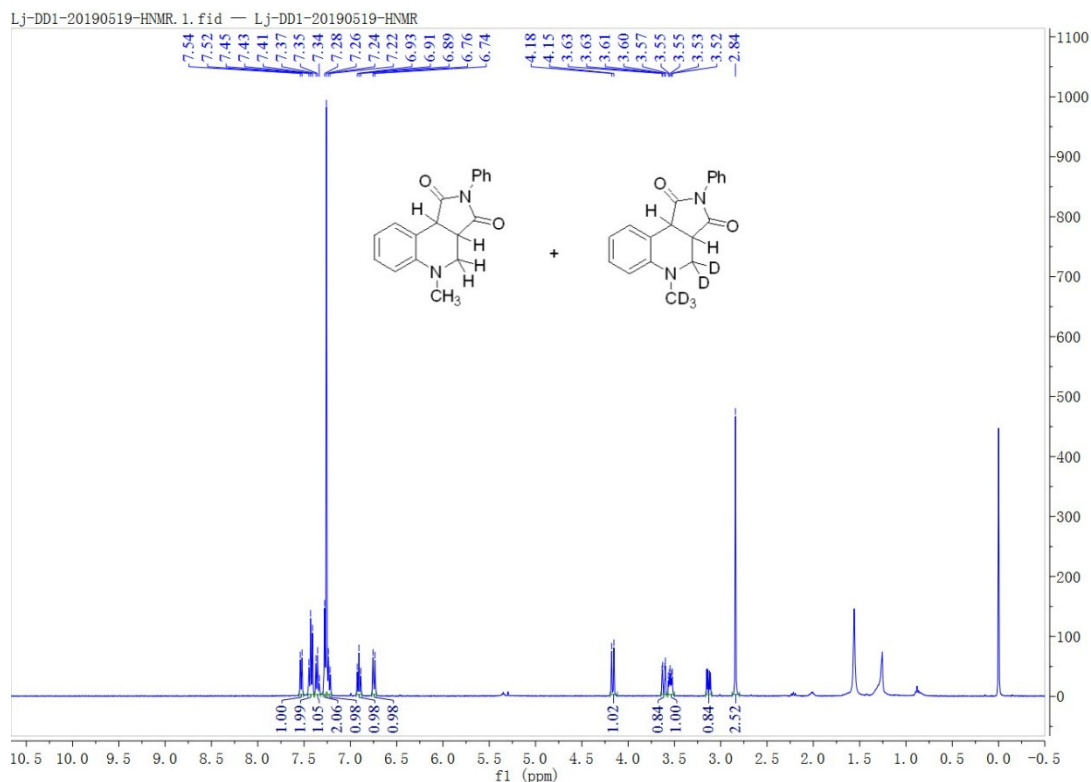

**Figure S4.** Intermolecular KIE.

**4.3 Intramolecular deuterium isotope effects.** The intramolecular deuterium isotope effect was measured by using *N*-methyl-*N*-trideuteriomethyl aniline as the substrate.  $k_H/k_D$  (intra) was determined to be 4.26 by the relative intensity of  $^1\text{H}$  NMR signals of  $\text{N-CH}_3$  ( $\delta$ 2.84) and  $\text{N-CH}_2$  ( $\delta$ 3.62 and 3.14) ppm.

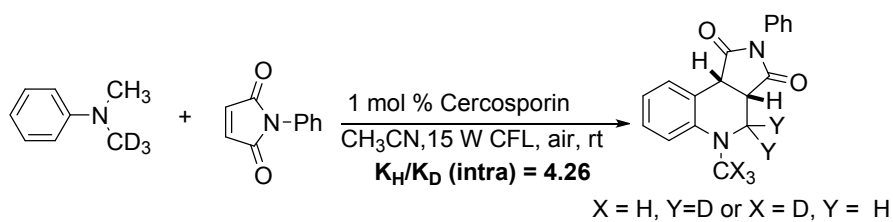

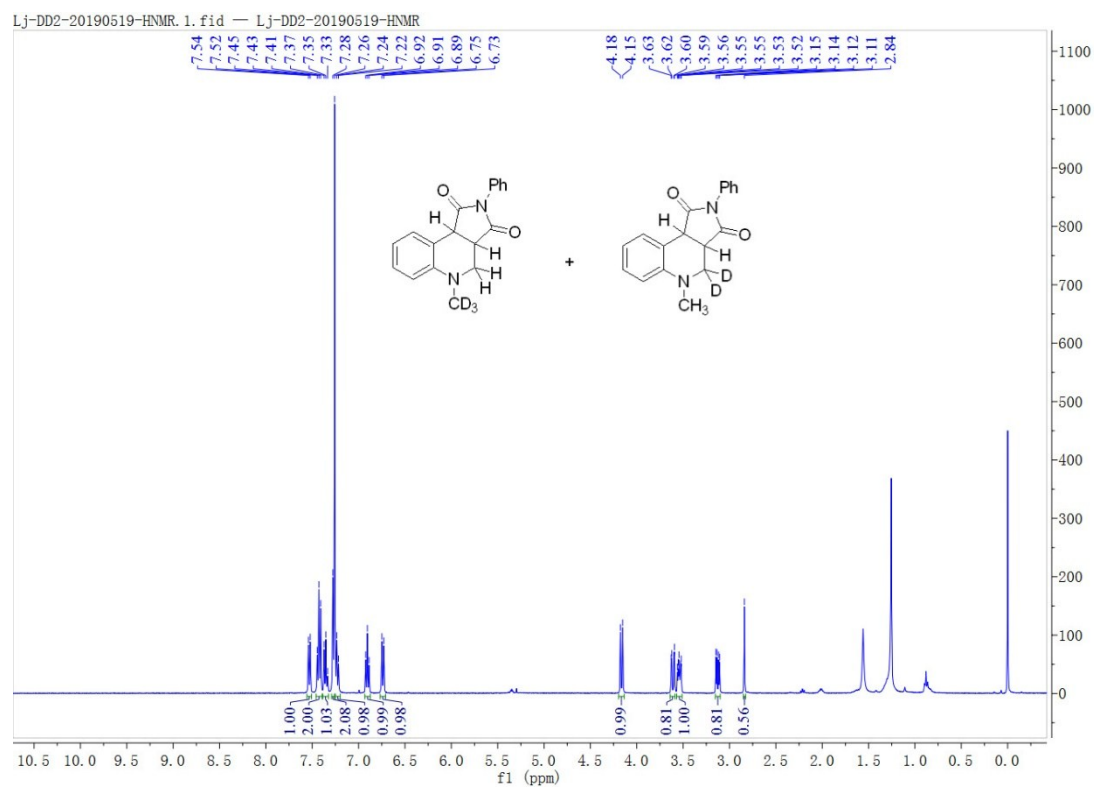

**Figure S5.** Intramolecular KIE.

## 5. Characterization Data for All Compounds

*5,8-Dimethyl-2-phenyl-3a,4,5,9b-tetrahydro-1H-pyrrolo[3,4-c]quinoline-1,3(2H)-dione (3a)*.<sup>3-5,7-8</sup>

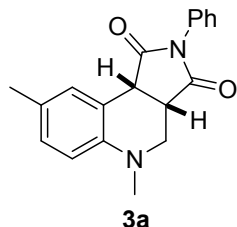

The product was obtained as white solid, mp. 193-195 °C, yield 68.8 mg, 90%, following the general procedure using 4,*N,N*-trimethylaniline and *N*-phenylmaleimide. <sup>1</sup>H NMR (400 MHz, CDCl<sub>3</sub>) δ 7.42 (t, *J* = 7.6 Hz, 2H), 7.36 (d, *J* = 7.6 Hz, 2H), 7.27 (d, *J* = 7.2 Hz, 2H), 7.04 (d, *J* = 8.2 Hz, 1H), 6.65 (d, *J* = 8.3 Hz, 1H), 4.12 (d, *J* = 9.5 Hz, 1H), 3.58 (dd, *J* = 11.4, 2.6 Hz, 1H), 3.51 (ddd, *J* = 9.6, 4.2, 2.7 Hz, 1H), 3.05 (dd, *J* = 11.4, 4.4 Hz, 1H), 2.80 (s, 3H), 2.30 (s, 3H) ppm.

*5,7-Dimethyl-2-phenyl-3a,4,5,9b-tetrahydro-1H-pyrrolo[3,4-c]quinoline-1,3(2H)-dione (3b)*<sup>2, 4, 7, 9-11</sup> and *5,9-Dimethyl-2-phenyl-3a,4,5,9b-tetrahydro-1H-pyrrolo[3,4-c]quinoline-1,3(2H)-dione (3c)*<sup>2,4,7,9,11</sup>

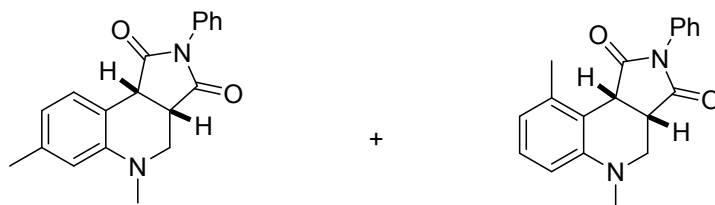

The products were obtained as white solid, yield 60 %, 45.9 mg, with the ratio **3b**: **3c**= 1:1.85; following the general procedure using *N,N,3*-Trimethylaniline and *N*-phenylmaleimide. <sup>1</sup>H NMR (400 MHz, CDCl<sub>3</sub>) δ 7.49–7.40 (m, 3.83 H), 7.37–7.27 (m,

2.56 H), 7.12 (t,  $J = 8.0$  Hz, 0.59 H), 6.83 (d,  $J = 8.0$  Hz, 0.68 H), 6.72 (d,  $J = 8.0$  Hz, 0.37H), 6.63 (d,  $J = 8.0$  Hz, 0.59 H), 6.55 (s, 0.34 H), 4.50 (d,  $J = 8.0$  Hz, 0.57 H), 4.12 (d,  $J = 12.0$  Hz, 0.37 H), 3.55–3.52 (m, 2.0 H), 3.08 (dd,  $J = 11.5, 4.4$  Hz, 0.39 H), 2.95 (dd,  $J = 11.3, 4.8$  Hz, 0.64H), 2.82 (s, 1.18 H), 2.80 (d,  $J = 14.5$  Hz, 3 H), 2.59 (s, 1.78 H), 2.32 (s, 1.17 H) ppm.

*5-Methyl-2-phenyl-3a, 4, 5, 9b-tetrahydro-1H-pyrrolo[3,4-c]quinoline -1,3(2H)-dione (3d).*<sup>3-8</sup>

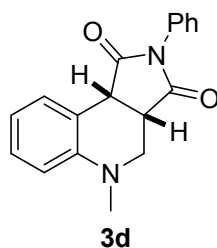

The product was obtained as white solid, mp. 194-196 °C, yield 91 %, 66.7 mg; following the general procedure using *N,N*-dimethylaniline and *N*-phenylmaleimide. <sup>1</sup>H NMR (400 MHz, CDCl<sub>3</sub>)  $\delta$  7.52 (d,  $J = 7.6$  Hz, 1H), 7.42 (t,  $J = 7.6$  Hz, 2H), 7.35 (t,  $J = 7.3$  Hz, 1H), 7.27 – 7.21 (m, 3H), 6.90 (t,  $J = 7.5$  Hz, 1H), 6.74 (d,  $J = 8.2$  Hz, 1H), 4.15 (d,  $J = 9.5$  Hz, 1H), 3.61 (dd,  $J = 11.5, 2.7$  Hz, 1H), 3.53 (dt,  $J = 9.6, 3.8$  Hz, 1H), 3.11 (dd,  $J = 11.4, 4.4$  Hz, 1H), 2.83 (s, 3H) ppm.

*8-Fluoro-5-methyl-2-phenyl-3a,4,5,9b-tetrahydro-1H-pyrrolo[3,4-c]quinolone-1,3(2H)-dione (3e)*<sup>4,5,8</sup>

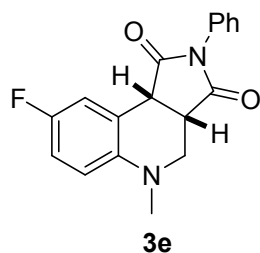

The product was obtained as white solid, mp. 172-174 °C, yield 44.9 mg, 58%, following the general procedure using 4-fluoro-*N,N*-dimethylaniline and *N*-phenylmaleimide. <sup>1</sup>H NMR (400 MHz, CDCl<sub>3</sub>) δ 7.43 (t, *J* = 8.3 Hz, 2H), 7.36 (t, *J* = 6.9 Hz, 1H), 7.25–7.29 (m, 3H), 6.93 (t, *J* = 8.7 Hz, 1H), 6.67 (dd, *J* = 9.2, 4.6 Hz, 1H), 4.11 (d, *J* = 9.5 Hz, 1H), 3.59 (d, *J* = 8.0 Hz, 1H), 3.53-3.51 (m, 1H), 3.07 (dd, *J* = 10.7, 4.5 Hz, 1H), 2.81 (s, 3H) ppm.

*8-Chloro-5-methyl-2-phenyl-3a,4,5,9b-tetrahydro-1H-pyrrolo[3,4-c]quinoline-1,3(2H)-dione (3f)*<sup>4,5,8</sup>

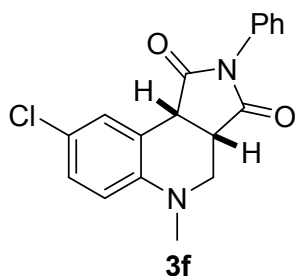

The product was obtained as white solid, mp. 155-157 °C, yield 52.1 mg, 64%, following the general procedure using 4-chloro-*N,N*-dimethylaniline and *N*-phenylmaleimide. <sup>1</sup>H NMR (CDCl<sub>3</sub>, 400 MHz, δ ppm): 7.50 (d, *J* = 2.8 Hz, 1H), 7.44 (m, 1H), 7.35 (m, 1H), 7.24 (m, 2H), 7.17 (*J* = 8.8, 2.4 Hz, 2H), 6.65 (d, *J* = 8.8 Hz, 1H), 4.08 (d, *J* = 9.6 Hz, 1H), 3.60 (dd, *J* = 11.6 Hz, 2.8 Hz, 1H), 3.50 (m, 1H), 3.08 (dd, *J* = 11.6 Hz, 4.4 Hz, 1H), 2.81 (s, 3H) ppm.

*8-Bromo-5-methyl-2-phenyl-3a,4,5,9b-tetrahydro-1H-pyrrolo[3,4-c]quinoline-1,3(2H)-dione (3g)*<sup>4-6, 8</sup>

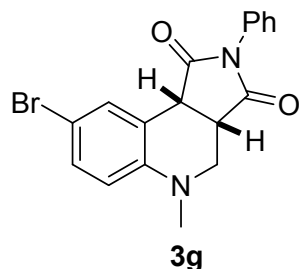

The product was obtained as white solid, mp. 157-159 °C, yield 84.4 mg, 91%, following the general procedure using 4-bromo-*N,N*-dimethylaniline and *N*-phenylmaleimide. <sup>1</sup>H NMR (CDCl<sub>3</sub>, 400 MHz, δ ppm): 7.64 (s, 1H), 7.45-7.42 (t, *J* = 7.6 Hz, 2H), 7.38-7.35 (t, *J* = 7.36 Hz 1H), 7.31 (d, *J* = 8.7 Hz, 1H), 7.27-7.25 (m, 2H), 6.60 (d, *J* = 8.7 Hz, 1H), 4.10 (d, *J* = 9.6 Hz, 1H), 3.60 (dd, *J* = 12 Hz, 2.8 Hz, 1H), 3.53 (m, 1H), 3.11 (dd, *J* = 11.5 Hz, 4.4 Hz, 1H), 2.82 (s, 3H) ppm.

*2-(4-Bromophenyl)-5-methyl-3a,4,5,9b-tetrahydro-1H-pyrrolo[3,4-c]quinoline-1,3(2H)-dione (3h)*<sup>12</sup>

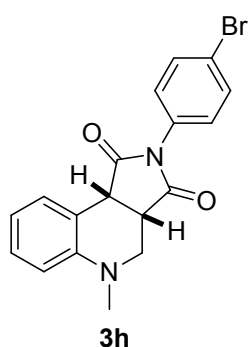

The product was obtained as white solid, mp. 222-226 °C, yield 57.3 mg, 62%, following the general procedure using *N,N*-dimethylaniline and (4-bromophenyl)maleinimide. <sup>1</sup>H NMR (CDCl<sub>3</sub>, 400 MHz, δ ppm): 7.56-7.50 (m, 3H),

7.24-7.17 (m, 3H), 6.95-6.87 (t,  $J = 7.7$  Hz, 1H), 6.74(d,  $J = 8.2$  Hz, 1H), 4.16 (d,  $J = 9.6$  Hz, 1H), 3.61(dd,  $J = 11.5, 2.6$  Hz, 1H), 3.52 (m, 1H), 3.11 (dd,  $J = 11.5$  Hz, 4.4 Hz, 1H), 2.83 (s, 3H) ppm.

*2-(4-Bromophenyl)-5,8-dimethyl-3a,4,5,9b-tetrahydro-1H-pyrrolo[3,4-c]quinoline-1,3(2H)-dione (3i)*<sup>4</sup>

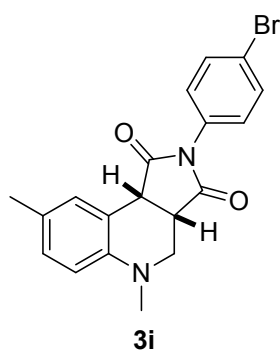

The product was obtained as white solid, mp. 183-185 °C, yield 85.4 mg, 89%, following the general procedure using 4,*N,N*-trimethylaniline and (4-bromophenyl)maleinimide. <sup>1</sup>H NMR (400 MHz, CDCl<sub>3</sub>)  $\delta$  7.59 (d,  $J = 8.6$  Hz, 1H ), 7.55 (d,  $J = 2.1$  Hz, 2H), 7.33 (s, 1H), 7.19 (dd,  $J = 8.3$  Hz, 2H ), 7.04 (d,  $J = 8.3$  Hz, 1H), 6.65 (d,  $J = 8.2$  Hz, 1H), 4.11 (d,  $J = 9.5$  Hz, 1H), 3.59 (dd,  $J = 11.4, 4$  Hz, 1H), 3.54 (d,  $J = 8.0$  Hz, 1H), 3.04 (d,  $J = 7.3$  Hz, 1H), 2.80 (s, 3H), 2.30 (s, 3H) ppm.

*2-(4-Bromophenyl)-5-methyl-8-fluoro-3a,4,5,9b-tetrahydro-1H-pyrrolo[3,4-c]quinoline-1,3(2H)-dione (3j)*(new compound).

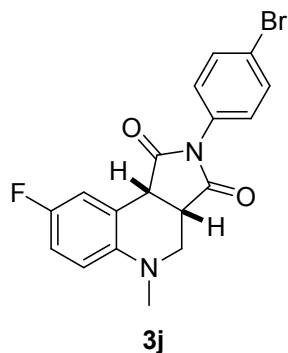

The product was obtained as white solid, mp. 175-177 °C, 50.5 mg, yield 52%, following the general procedure using 4-fluoro-*N,N* dimethylaniline and (4-bromophenyl)maleinimide.  $^1\text{H}$  NMR (400 MHz,  $\text{CDCl}_3$ )  $\delta$  7.56 (d,  $J = 8.2$  Hz, 2H ), 7.27-7.24 (m, 1H), 7.18 (d,  $J = 8.6$  Hz, 2H), 6.94 (td,  $J = 8.6$  Hz, 3.0 Hz, 1H ), 6.66 (dd,  $J = 9.0$  Hz, 4.6 Hz, 1H), 4.11 (d,  $J = 9.6$  Hz, 1H), 3.58 (dd,  $J = 11.5$ , 2.7 Hz, 1H), 3.52 (m, 1H), 3.06 (dd,  $J = 11.5$ , 4.4 Hz, 1H), 2.81 (s, 3H) ppm;  $^{13}\text{C}$  NMR ( $\text{CDCl}_3$ , 100 MHz,  $\delta$  ppm): 177.07, 174.84, 157.86 (d,  $^1J_{\text{C-F}} = 237$  Hz), 144.99, 144.97, 132.21, 130.87, 127.82, 122.42, 119.86 (d,  $^3J_{\text{C-F}} = 8$  Hz), 117.07 (d,  $^2J_{\text{C-F}} = 23$  Hz), 115.31 (d,  $^2J_{\text{C-F}} = 21$  Hz), 113.52 (d,  $^3J_{\text{C-F}} = 8$  Hz), 51.01, 43.49, 42.24, 39.75 ppm. HRMS (ESI-QTOF) exact mass calcd for  $\text{C}_{18}\text{H}_{15}\text{BrFN}_2\text{O}_2$   $[\text{M} + \text{H}]^+$  389.0301, found 389.0304.

*2-(4-Bromophenyl)-5-methyl-8-bromo-3a,4,5,9b-tetrahydro-1H-pyrrolo[3,4-c]quinoline-1,3(2H)-dione (3k)* (new compound).

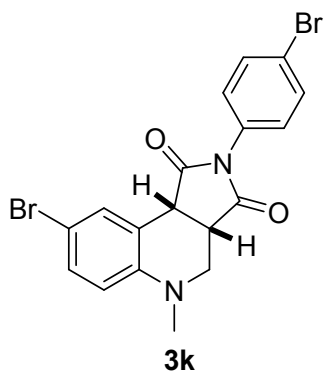

The product was obtained as white solid, mp. 180-185 °C, yield 93 mg, 83%, following the general procedure using 4-bromo-*N,N*-dimethylaniline and (4-bromophenyl)maleinimide. <sup>1</sup>H NMR (400 MHz, CDCl<sub>3</sub>) δ 7.63 (s, 1H), 7.56 (d, *J* = 8.4 Hz, 2H), 7.33 (dd, *J* = 8.7, 2.3 Hz, 1H), 7.18 (d, *J* = 8.4 Hz, 2H), 6.61 (d, *J* = 8.7 Hz, 1H), 4.11 (d, *J* = 9.5 Hz, 1H), 3.60 (dd, *J* = 11.5, 2.6 Hz, 1H), 3.53 (m, 1H), 3.10 (dd, *J* = 11.6, 4.4 Hz, 1H), 2.81 (s, 3H) ppm; <sup>13</sup>C NMR (CDCl<sub>3</sub>, 100 MHz, δ ppm): 176.86, 174.75, 147.46, 132.71, 132.21, 131.57, 130.82, 127.77, 122.44, 120.14, 114.28, 111.80, 50.34, 43.34, 41.79, 39.45 ppm. HRMS (ESI-QTOF) exact mass calcd for C<sub>18</sub>H<sub>15</sub>Br<sub>2</sub>N<sub>2</sub>O<sub>2</sub> [M + H]<sup>+</sup> 450.9480, found 450.9483.

*2-Benzyl-5-methyl-3a,4,5,9b-tetrahydro-1H-pyrrolo[3,4-*c*]quinoline-1,3(2H)-dione*

**(3I)**<sup>5,6,8</sup>

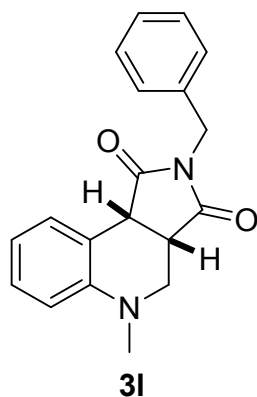

The product was obtained as white solid, mp. 106-110 °C, yield 46 mg, 60 %, following the general procedure using *N,N*-dimethylaniline and *N*-benzylmaleimide. <sup>1</sup>H NMR (400 MHz, CDCl<sub>3</sub>) δ 7.47 (d, *J* = 7.5 Hz, 1H), 7.32-7.17 (m, 6H), 6.89 (t, *J* = 7.4 Hz, 1H), 6.71 (d, *J* = 8.2 Hz, 1H), 4.65 (q, *J* = 14.3 Hz, 2H), 3.99 (d, *J* = 9.4 Hz, 1H), 3.49 (dd, *J* = 11.5, 2.7 Hz, 1H), 3.36 (m, 1H), 3.05 (dd, *J* = 11.5, 4.5 Hz, 1H), 2.80 (s, 3H) ppm.

*2-Benzyl-5,7-dimethyl-3a,4,5,9b-tetrahydro-1H-pyrrolo[3,4-c]quinoline-1,3(2H)-dione (3m)* (new compound).

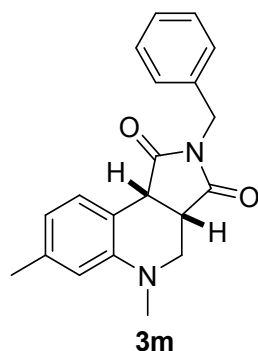

The product was obtained as white solid, mp. 120-122 °C, yield 54 mg, 67%, following the general procedure using *N,N*,3-trimethylaniline and *N*-benzylmaleimide. <sup>1</sup>H NMR (400 MHz, CDCl<sub>3</sub>) δ 7.32-7.27 (m, 5H), 7.10 (t, *J* = 7.8 Hz, 1H), 6.79 (d, *J* = 7.5 Hz, 1H), 6.60 (d, *J* = 8.1 Hz, 1H), 4.67 (q, *J* = 14.3 Hz, 2H), 4.35 (d, *J* = 9.6 Hz, 1H), 3.49 (dd, *J* = 11.4, 1.5 Hz, 1H), 3.36 (dd, *J* = 9.5, 5.1 Hz, 1H), 2.88 (dd, *J* = 11.3, 4.8 Hz, 1H), 2.74 (s, 3H), 2.55 (s, 3H) ppm; <sup>13</sup>C NMR (CDCl<sub>3</sub>, 100 MHz, δ ppm): 179.12, 176.25, 149.98, 138.38, 135.63, 128.55, 128.21, 127.93, 127.71, 122.65, 119.57, 110.52, 52.39, 44.90, 42.79, 39.64, 39.41, 20.30 ppm. HRMS (ESI-QTOF) exact mass calcd for C<sub>20</sub>H<sub>21</sub>N<sub>2</sub>O<sub>2</sub> [M + H]<sup>+</sup> 321.1603, found 321.1624.

*2-Benzyl-5,8-dimethyl-3a,4,5,9b-tetrahydro-1H-pyrrolo[3,4-c]quinoline-1,3(2H)-dione (3n)*<sup>3-5,8</sup>

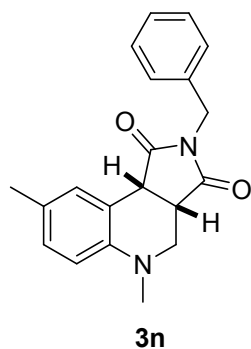

The product was obtained as white solid, mp. 117-119 °C, yield 58.4 mg, 73%, following the general procedure using 4,*N,N*-trimethylaniline and *N*-benzylmaleimide. <sup>1</sup>H NMR (400 MHz, CDCl<sub>3</sub>) δ 7.30-7.25 (m, 6H), 7.01 (dd, *J* = 8.2, 2.5 Hz, 1H), 6.92 (d, *J* = 8.3 Hz, 1H), 4.63 (q, *J* = 14.3 Hz, 2H), 3.94 (d, *J* = 9.4 Hz, 1H), 3.46 (dd, *J* = 8, 2.4 Hz, 1H), 3.35 (m, 1H), 2.97 (dd, *J* = 11.4, 4.5 Hz, 1H), 2.76 (s, 3H), 2.29 (s, 3H) ppm.

*2-Benzyl-5-methyl-8-fluoro-3a,4,5,9b-tetrahydro-1H-pyrrolo[3,4-c]quinoline-1,3(2H)-dione (3o)*<sup>8</sup>

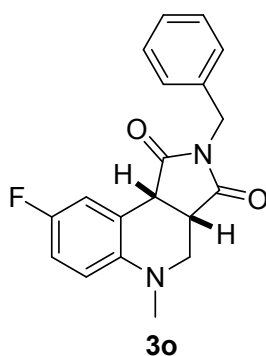

The product was obtained as white solid, mp. 115-117 °C, yield 42.9 mg, 53%, following the general procedure using 4-fluoro-*N,N*-dimethylaniline and *N*-benzylmaleimide. <sup>1</sup>H NMR (400 MHz, CDCl<sub>3</sub>) δ 7.30-7.24 (m, 5H), 7.22 (dd, *J* = 8.7 Hz, 3.0 Hz, 1H), 6.92 (td, *J* = 8.6, 3.0 Hz, 1H), 6.62 (dd, *J* = 9.0, 4.6 Hz, 1H), 4.66 (q, *J* = 11.6 Hz, 2H), 3.94 (d, *J* = 9.4 Hz, 1H), 3.47 (dd, *J* = 11.5, 2.8 Hz, 1H), 3.35 (m,

1H), 2.99 (dd,  $J = 11.5, 4.6$  Hz, 1H), 2.77 (s, 3H) ppm.

*2-Benzyl-5-methyl-8-chloro-3a,4,5,9b-tetrahydro-1H-pyrrolo[3,4-*c*]quinoline-1,3(2H)-dione (3p)*<sup>8</sup>

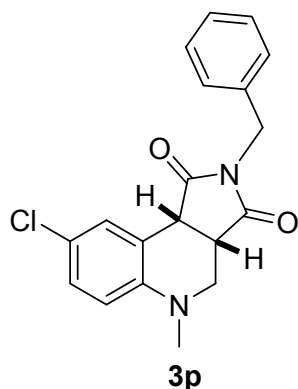

The product was obtained as white solid, mp. 134-136 °C, yield 68.8 mg, 81%, following the general procedure using 4-chloro-*N,N*-dimethylaniline and *N*-benzylmaleimide. <sup>1</sup>H NMR (400 MHz, CDCl<sub>3</sub>)  $\delta$  7.44 (d,  $J = 2.4$  Hz, 1H), 7.27 (m, 5H), 7.15 (dd,  $J = 8.8, 2.4$  Hz, 1H), 6.62 (d,  $J = 8.8$  Hz, 1H), 4.65 (q,  $J = 14.4$  Hz, 2H), 3.92 (d,  $J = 9.2$  Hz, 1H), 3.47 (dd,  $J = 11.6, 2.8$  Hz, 1H), 3.35 (m, 1H), 3.02 (dd,  $J = 11.6, 4.4$  Hz, 1H), 2.78 (s, 3H) ppm.

*2-Benzyl-5-methyl-8-bromo-3a,4,5,9b-tetrahydro-1H-pyrrolo[3,4-*c*]quinoline-1,3(2H)-dione (3q)*<sup>5,8</sup>

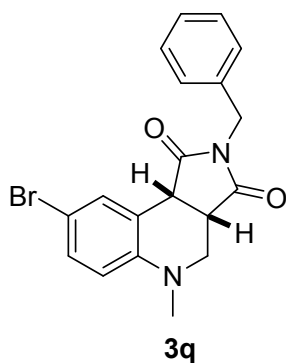

The product was obtained as white solid, mp. 148-150°C, yield 64 mg, 66 %, following

the general procedure using 4-bromo-*N,N*-dimethylaniline and *N*-benzylmaleimide. <sup>1</sup>H NMR (400 MHz, CDCl<sub>3</sub>)  $\delta$  7.58 (s, 1H), 7.31-7.27 (m, 6H), 6.57 (d, *J* = 8.7 Hz, 1H), 4.66 (q, *J* = 14.3 Hz, 2H), 3.93 (d, *J* = 9.4 Hz, 1H), 3.51 (dd, *J* = 11.5, 2.9 Hz, 1H), 3.48 (ddd, *J* = 9.5, 4.6, 2.9 Hz, 1H), 3.37 (m, 1H), 3.03 (dd, *J* = 11.5, 4.5 Hz, 1H), 2.78 (s, 3H) ppm.

*2,5-Dimethyl-3a,4,5,9b-tetrahydro-1H-pyrrolo[3,4-*c*]quinoline-1,3(2H)-dione (3r)*<sup>5-8</sup>

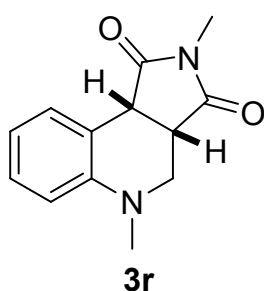

The product was obtained as white solid, mp. 170-172 °C, yield 45.4 mg, 79%, following the general procedure using *N,N*-dimethylaniline and *N*-methylmaleimide. <sup>1</sup>H NMR (400 MHz, CDCl<sub>3</sub>)  $\delta$  7.47 (d, *J* = 7.5 Hz, 1H), 7.21 (t, 1H), 6.89 (t, *J* = 7.6 Hz, 1H), 6.69 (d, *J* = 8.4 Hz, 1H), 4.00 (d, *J* = 9.2 Hz, 1H), 3.53 (dd, *J* = 11.2, 2.4 Hz, 1H), 3.38 (m, 1H), 3.03 (d, *J* = 11.6, 4.4 Hz, 1H), 2.99 (s, 3H), 2.80 (s, 3H) ppm.

*2,5,7-Trimethyl-3a,4,5,9b-tetrahydro-1H-pyrrolo[3,4-*c*]quinoline-1,3(2H)-dione (3s)* and *2,5,9-Trimethyl-3a,4,5,9b-tetrahydro-1H-pyrrolo[3,4-*c*]quinoline-1,3(2H)-dione (3t)* (new compound).

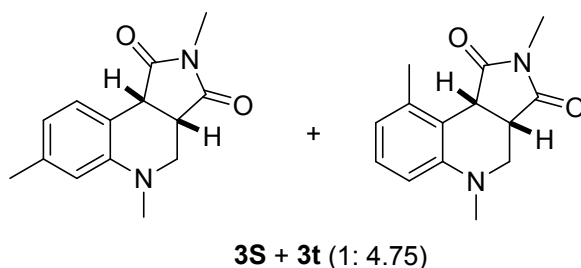

The products were obtained as white solid, yield 87 %, 53 mg, the ratio of **3s** : **3t** = 1:4.26, following the general procedure using *N,N,3*-trimethylaniline and *N*-methylmaleimide. <sup>1</sup>H NMR (400 MHz, CDCl<sub>3</sub>) δ 7.36 (d, *J* = 8 Hz, 0.24 H), 7.10 (t, *J* = 7.8 Hz, 1 H), 6.80 (d, *J* = 7.5 Hz, 0.96 H), 6.72 (d, *J* = 7.6 Hz, 0.19 H), 6.58 (d, *J* = 8.2 Hz, 0.99 H), 6.51 (s, 0.17 H), 4.35 (d, *J* = 9.6 Hz, 0.96 H), 3.5 (d, *J* = 11.4 Hz, 1H), 3.36 (dd, *J* = 9.8, 4.9 Hz, 1.15H), 3.0 (s, 2.79 H), 2.98 (s, 0.56 H), 2.88 (dd, *J* = 11.4, 4.8 Hz, 1.09 H), 2.78 (s, 0.62 H), 2.74 (s, 2.89 H), 2.58 (s, 2.85 H), 2.31 (s, 0.56 H) ppm. <sup>13</sup>C NMR (CDCl<sub>3</sub>, 100 MHz, δ ppm): 177.45, 175.53, 169.05, 146.35, 134.31, 132.30, 132.14, 131.02, 130.78, 129.34, 129.11, 127.87, 127.35, 122.27, 121.61, 118.30, 112.60 ppm. HRMS (ESI-QTOF) exact mass calcd for C<sub>14</sub>H<sub>17</sub>N<sub>2</sub>O<sub>2</sub> [M + H]<sup>+</sup> 245.1290, found 245.1299.

*2,5,8-Trimethyl-3a,4,5,9b-tetrahydro-1H-pyrrolo[3,4-*c*]quinoline-1,3(2H)-dione*  
(**3u**).<sup>[3,5,7,8]</sup>

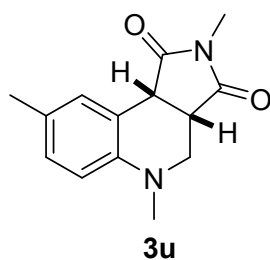

The product was obtained as white solid, mp. 173-176 °C, yield 50 mg, 82 %, following the general procedure using *N,N,4*-trimethylaniline and *N*-methylmaleimide. <sup>1</sup>H NMR (400 MHz, CDCl<sub>3</sub>) δ 7.30 (s, 1H), 7.01 (d, *J* = 8.2 Hz, 1H), 6.61 (d, *J* = 8.3 Hz, 1H), 3.96 (d, *J* = 9.4 Hz, 1H), 3.51 (dd, *J* = 11.4, 2.4 Hz, 1H), 3.34 (ddd, *J* = 9.5, 4.4, 2.4 Hz, 1H), 2.99 (s, 3H), 2.96 (d, *J* = 4.1 Hz, 1H), 2.76 (s, 3H), 2.30 (s, 3H) ppm.

*2,5-Dimethyl-8-fluoro-3a,4,5,9b-tetrahydro-1H-pyrrolo[3,4-c]quinoline-1,3(2H)-dione (3v)*<sup>8</sup>

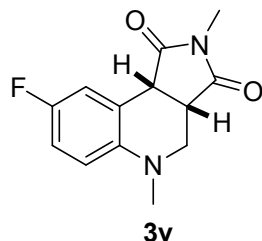

The product was obtained as white solid, mp. 142-145 °C, yield 39 mg, 63 %, following the general procedure using 4-fluoro-*N,N*-dimethylaniline and *N*-methylmaleimide. <sup>1</sup>H NMR (400 MHz, CDCl<sub>3</sub>)  $\delta$  7.23 (dd, *J* = 8 Hz, 4 Hz, 1H), 6.91 (td, *J* = 8.6, 3.0 Hz, 1H), 6.62 (dd, *J* = 9.0, 4.6 Hz, 1H), 3.96 (d, *J* = 9.4 Hz, 1H), 3.51 (dd, *J* = 11.5, 2.5 Hz, 1H), 3.37 (ddd, *J* = 9.5, 4.5, 2.6 Hz, 1H), 3.0 (s, 3H), 2.98 (d, *J* = 4 Hz, 1H), 2.77 (s, 3H) ppm.

*2,5-Dimethyl-8-chloro-3a,4,5,9b-tetrahydro-1H-pyrrolo[3,4-c]quinoline-1,3(2H)-dione (3w)*<sup>8</sup>

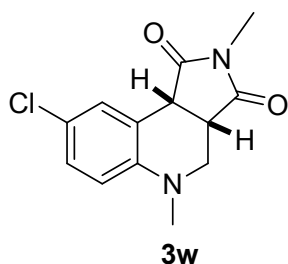

The product was obtained as white solid, mp. 174-176 °C, yield 46.8 mg, 71 %, following the general procedure using 4-chloro-*N,N*-dimethylaniline and *N*-methylmaleimide. <sup>1</sup>H NMR (400 MHz, CDCl<sub>3</sub>)  $\delta$  7.46 (d, *J* = 2 Hz, 1H), 7.16-7.13 (dd, *J* = 8.8, 2.4 Hz, 1H), 6.61 (d, *J* = 8.8 Hz, 1H), 3.95 (d, *J* = 8.8 Hz, 1H), 3.54-3.50 (dd,

$J=7.6, 2.0$  Hz, 1H), 3.36 (m, 1H), 3.02 (m, 1H), 2.99 (s, 3H), 2.78 (s, 3H) ppm.

*2,5-Dimethyl-8-bromo-3a,4,5,9b-tetrahydro-1H-pyrrolo[3,4-*c*]quinoline-1,3(2H)-dione (3x)*<sup>5-8</sup>

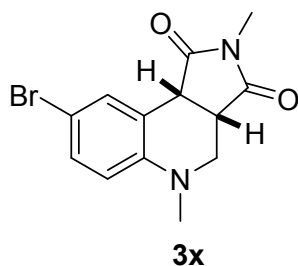

The product was obtained as white solid, mp. 187-190 °C, yield 52.5 mg, 68 %, following the general procedure using 4-bromo-*N,N*-dimethylaniline and *N*-methylmaleimide. <sup>1</sup>H NMR (400 MHz, CDCl<sub>3</sub>)  $\delta$  7.59 (s, 1H), 7.29 (dd,  $J = 8.8, 2.3$  Hz, 1H), 6.56 (d,  $J = 8.7$  Hz, 1H), 3.93 (d,  $J = 9.4$  Hz, 1H), 3.53 (dd,  $J = 11.5, 2.5$  Hz, 1H), 3.36 (m, 1H), 3.04 (dd,  $J = 8, 4$  Hz, 1H), 3.0 (s, 3H), 2.77 (s, 3H) ppm.

## 6. References

- [1] (a) S. W. Zhang, Z. C. Tang, W. H. Bao, J. Li, B. D. Guo, S. P. Huang, Y. Zhang, Y. J. Rao. *Org. Biomol. Chem.* **2019**, *17*, 4364-4369; (b) Y. Zhang, Y. Cao, L. Lu, S. Zhang, W. Bao, S. Huang, Y. Rao. *J. Org. Chem.* **2019**, *84*, 7711-7721.
- [2] X. L. Yang, J. D. Guo, T. Lei, B. Chen, C. H. Tung, L. Z. Wu. *Org. Lett.*, **2018**, *20*, 2916-2920.
- [3] M. Nishino, K. Hirano, T. Satoh, M. Miura, *J. Org. Chem.*, **2011**, *76*, 6447-6451.
- [4] X. Ju, D. Li, W. Li, W. Yu, F. Bian. *Adv. Synth. Catal.*, **2012**, *354*, 3561-3567.
- [5] J. Tang, G. Grampp, Y. Liu, B. X. Wang, F. F. Tao, L. J. Wang, X. Z. Liang, H. Q. Xiao, Y. M. Shen. *J. Org. Chem.*, **2015**, *80*, 2724-2732.
- [6] T. P. Nicholls, G. E. Constable, J. C. Robertson, M. G. Gardiner, C. Bissember. *ACS Catal.*, **2015**, *6*, 451-457.
- [7] Z. Liang, S. Xu, W. Tian, R. Zhang. *Beilstein J. Org. Chem.*, **2015**, *11*, 425-430.
- [8] J. T. Guo, D. C. Yang, Z. Guan, Y. H. He. *J. Org. Chem.*, **2017**, *82*, 1888-1894.
- [9] N. Sakai, S. Matsumoto, Y. Ogiwara. *Tetrahedron Lett.*, **2016**, *57*, 5449-5452.
- [10] F. Peng, P. Zhi, H. Ji, H. Zhao, F. Y. Kong, X. Z. Liang, Y. M. Shen. *RSC Adv.*, **2017**, *7*, 19948-19953.
- [11] K. Sharma, B. Das, P. Gogoi. *N. J. Chem.*, **2018**, *42*, 18894-18905.
- [12] S. Firoozi, M. Hosseini-Sarvari, M. Koohgard. *Green Chem.*, **2018**, *20*, 5540-5549.

## 7. Copies of $^1\text{H}$ NMR, $^{13}\text{C}$ NMR and HRMS Spectra

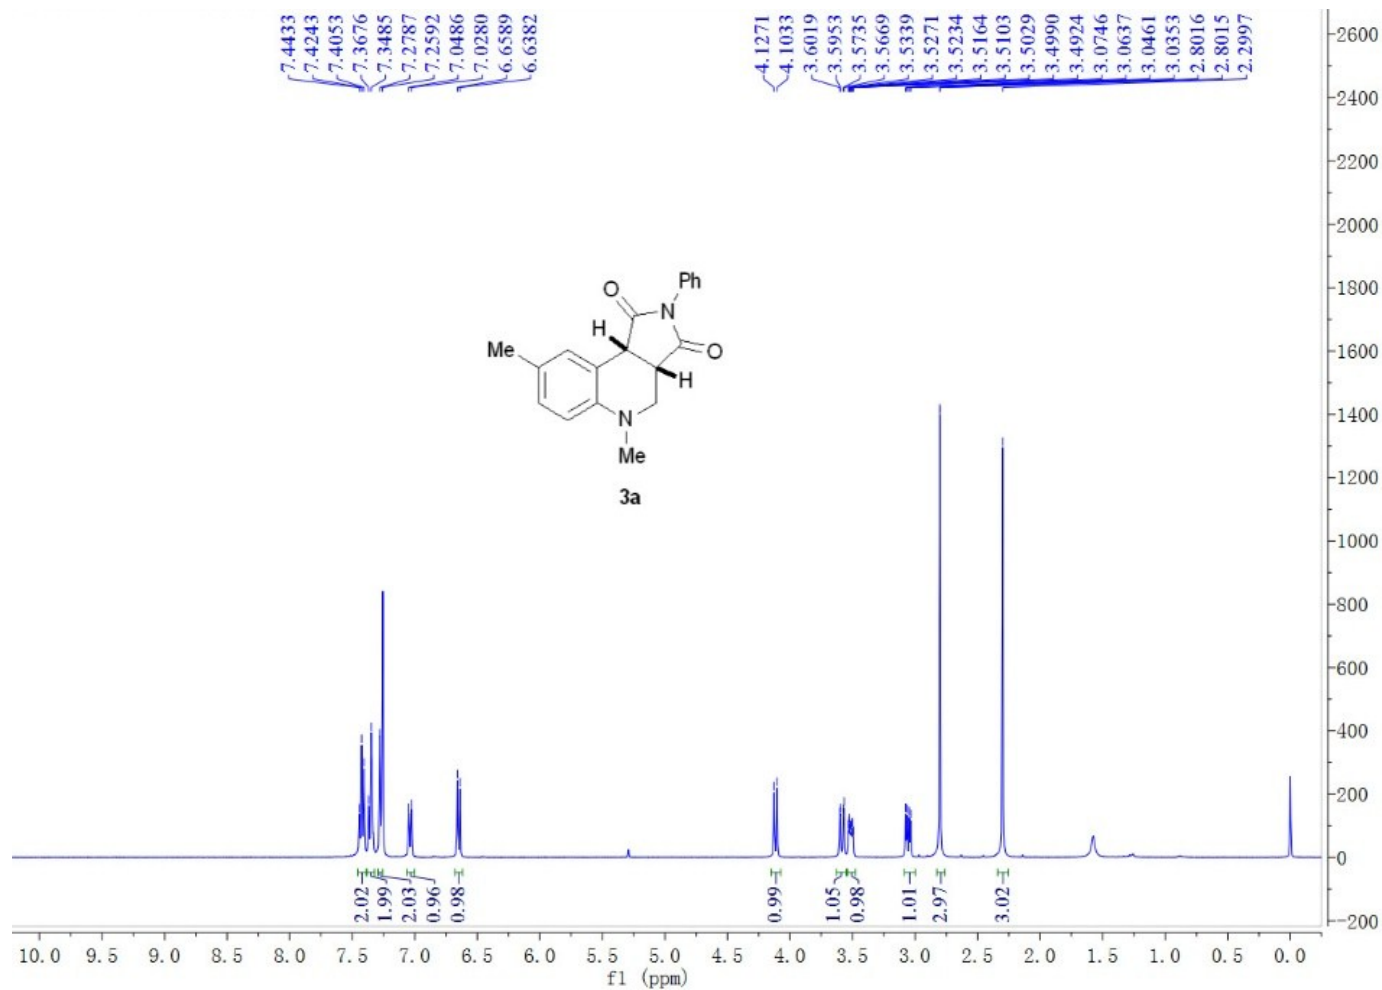

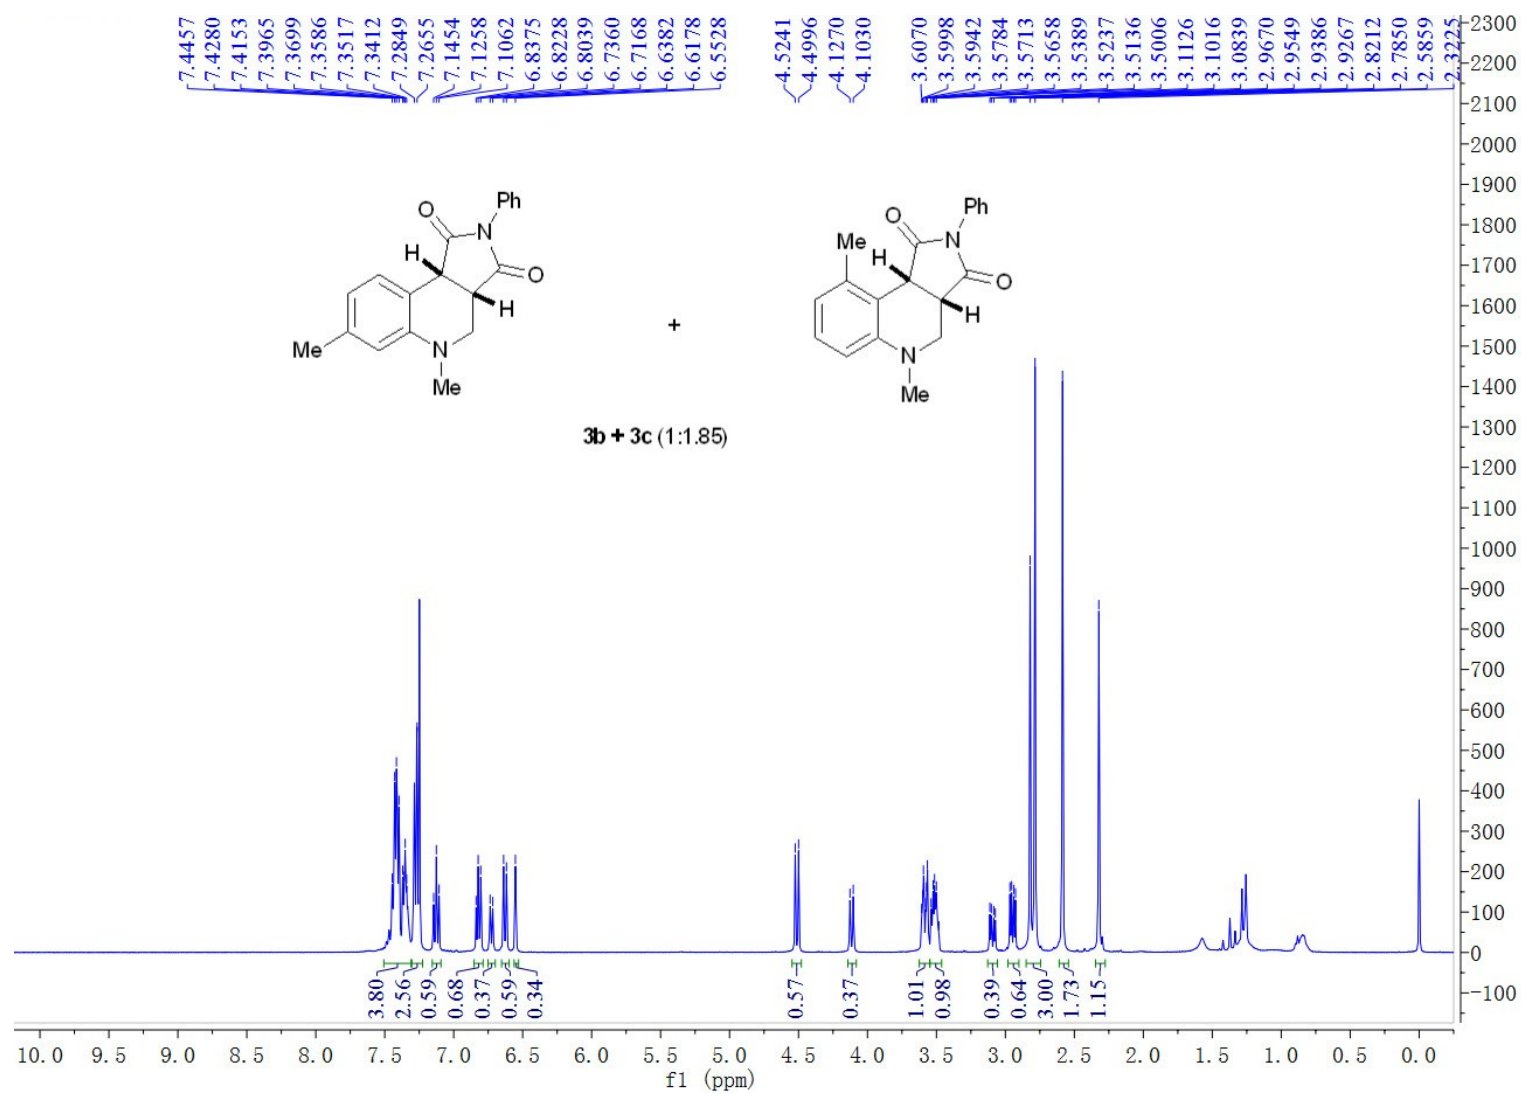

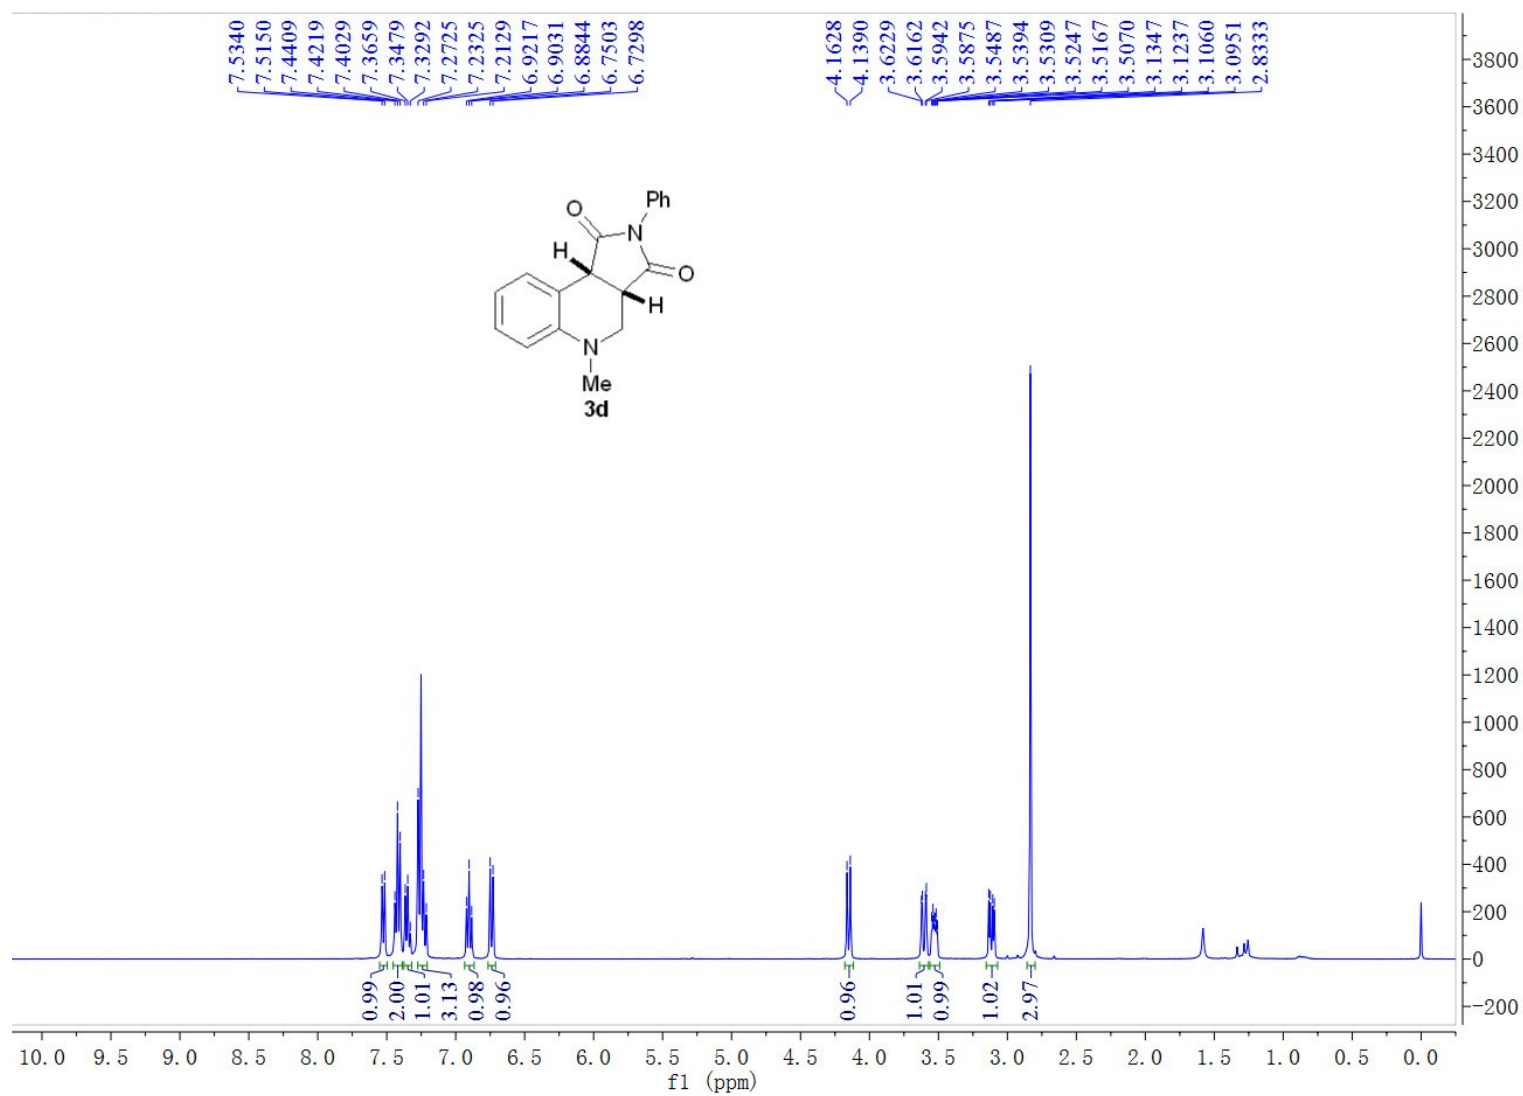

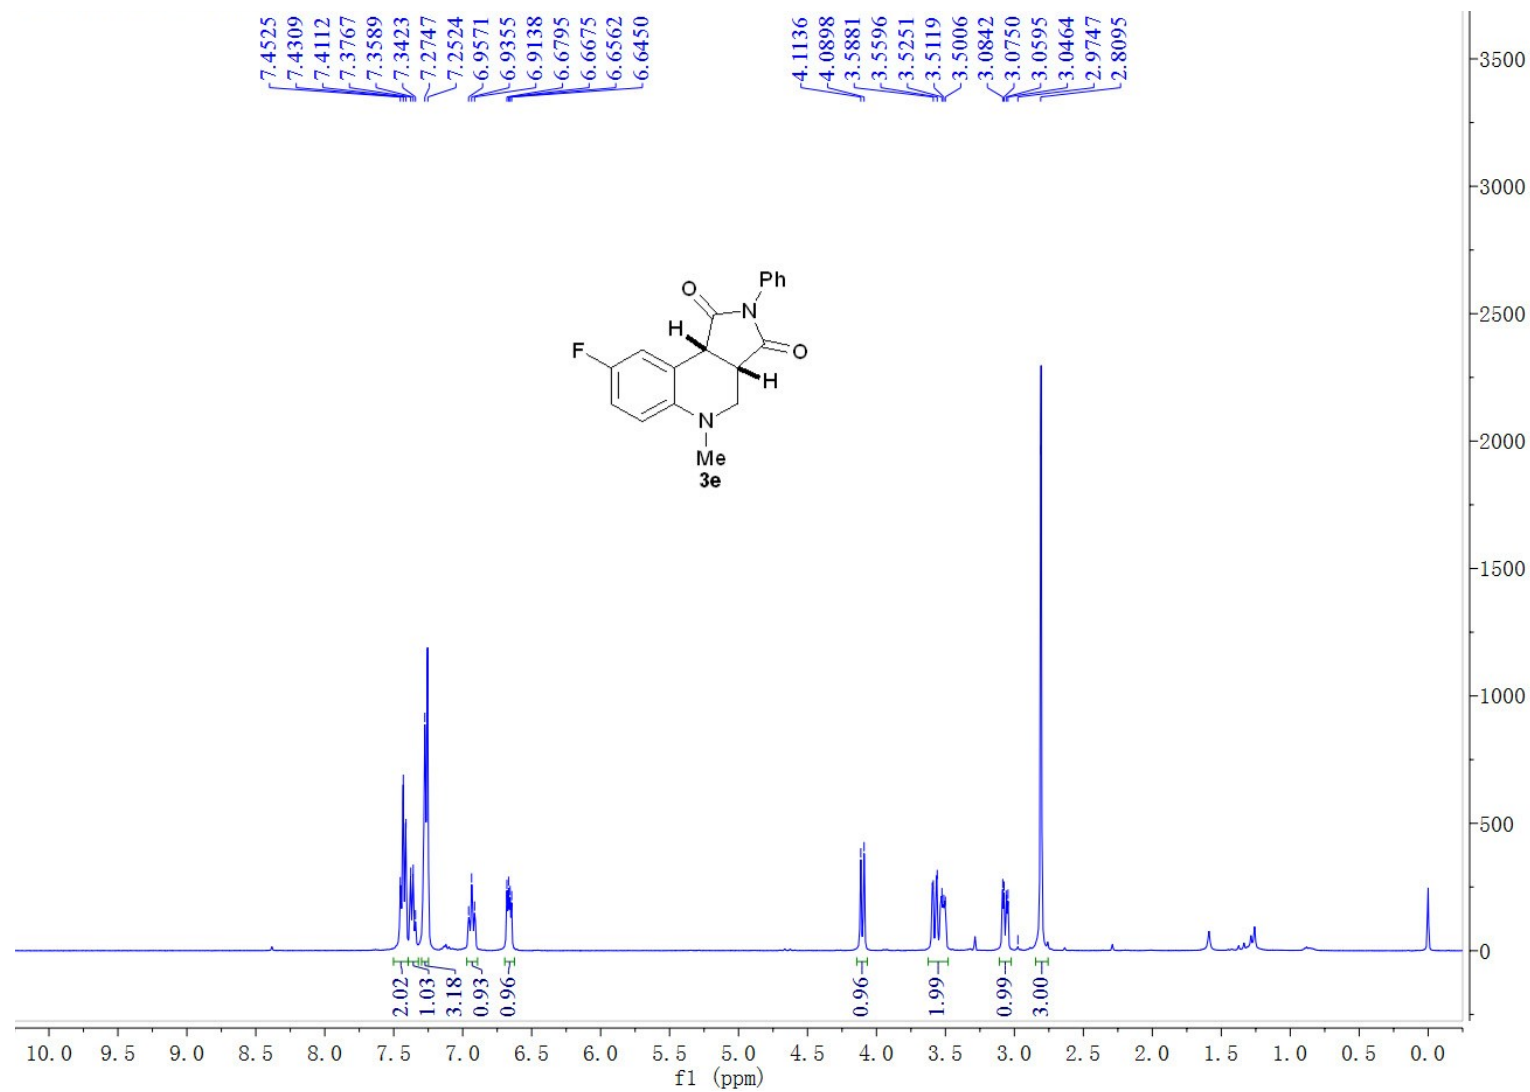

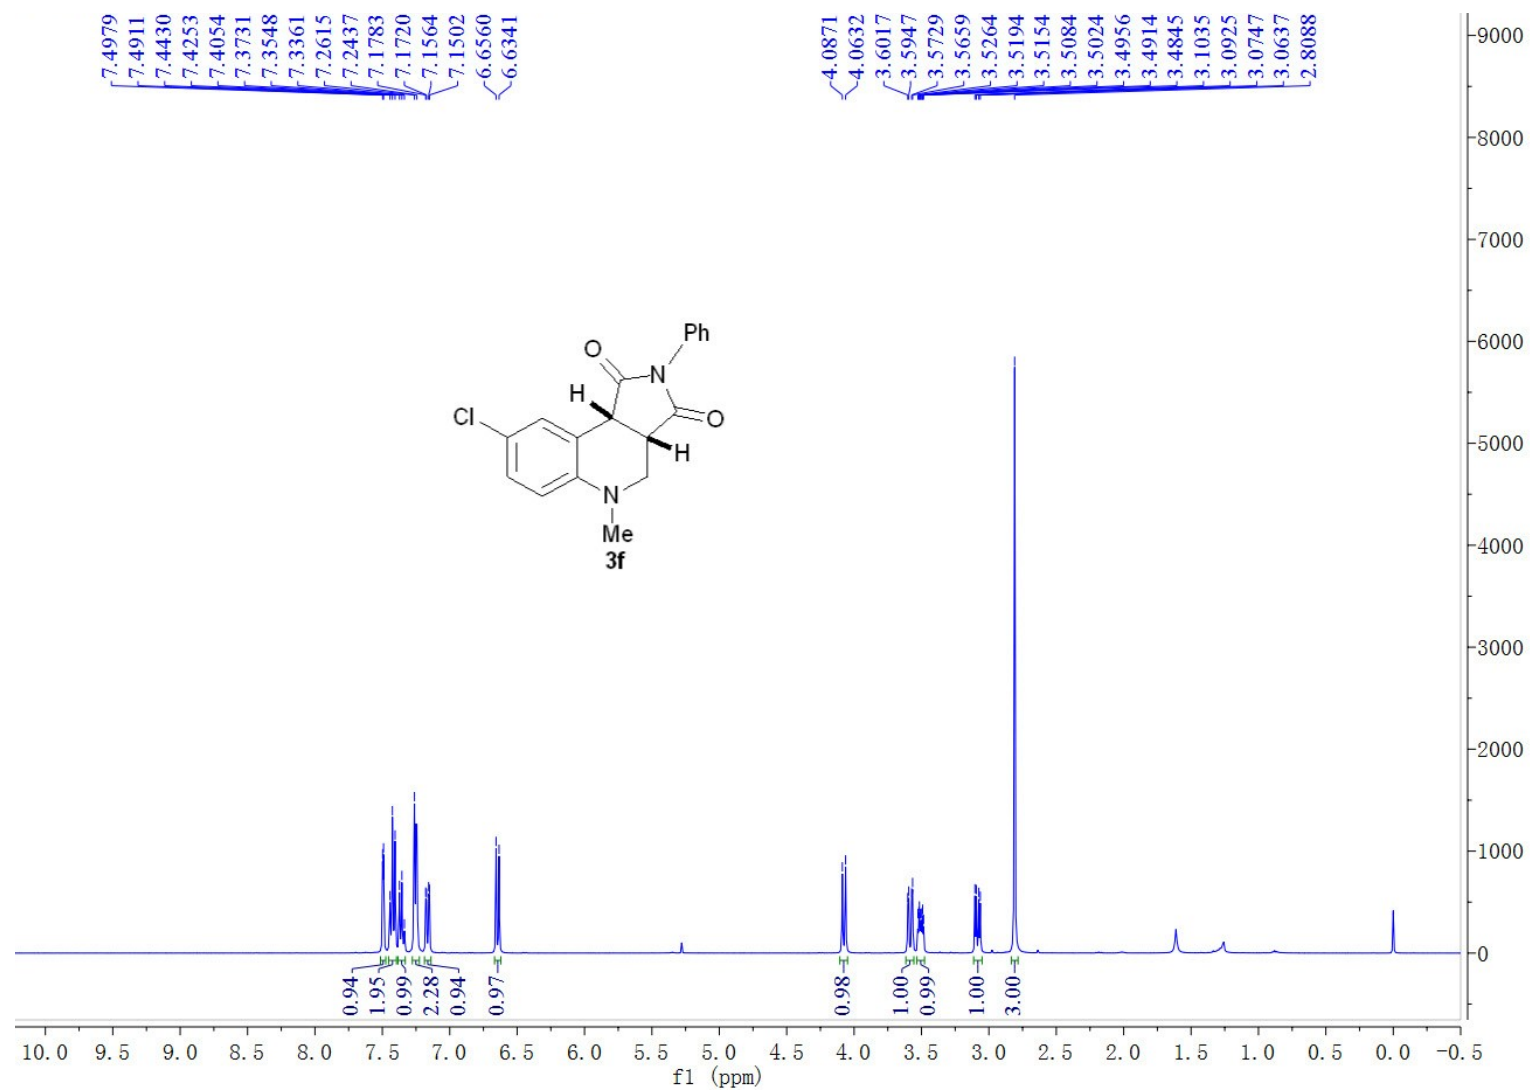

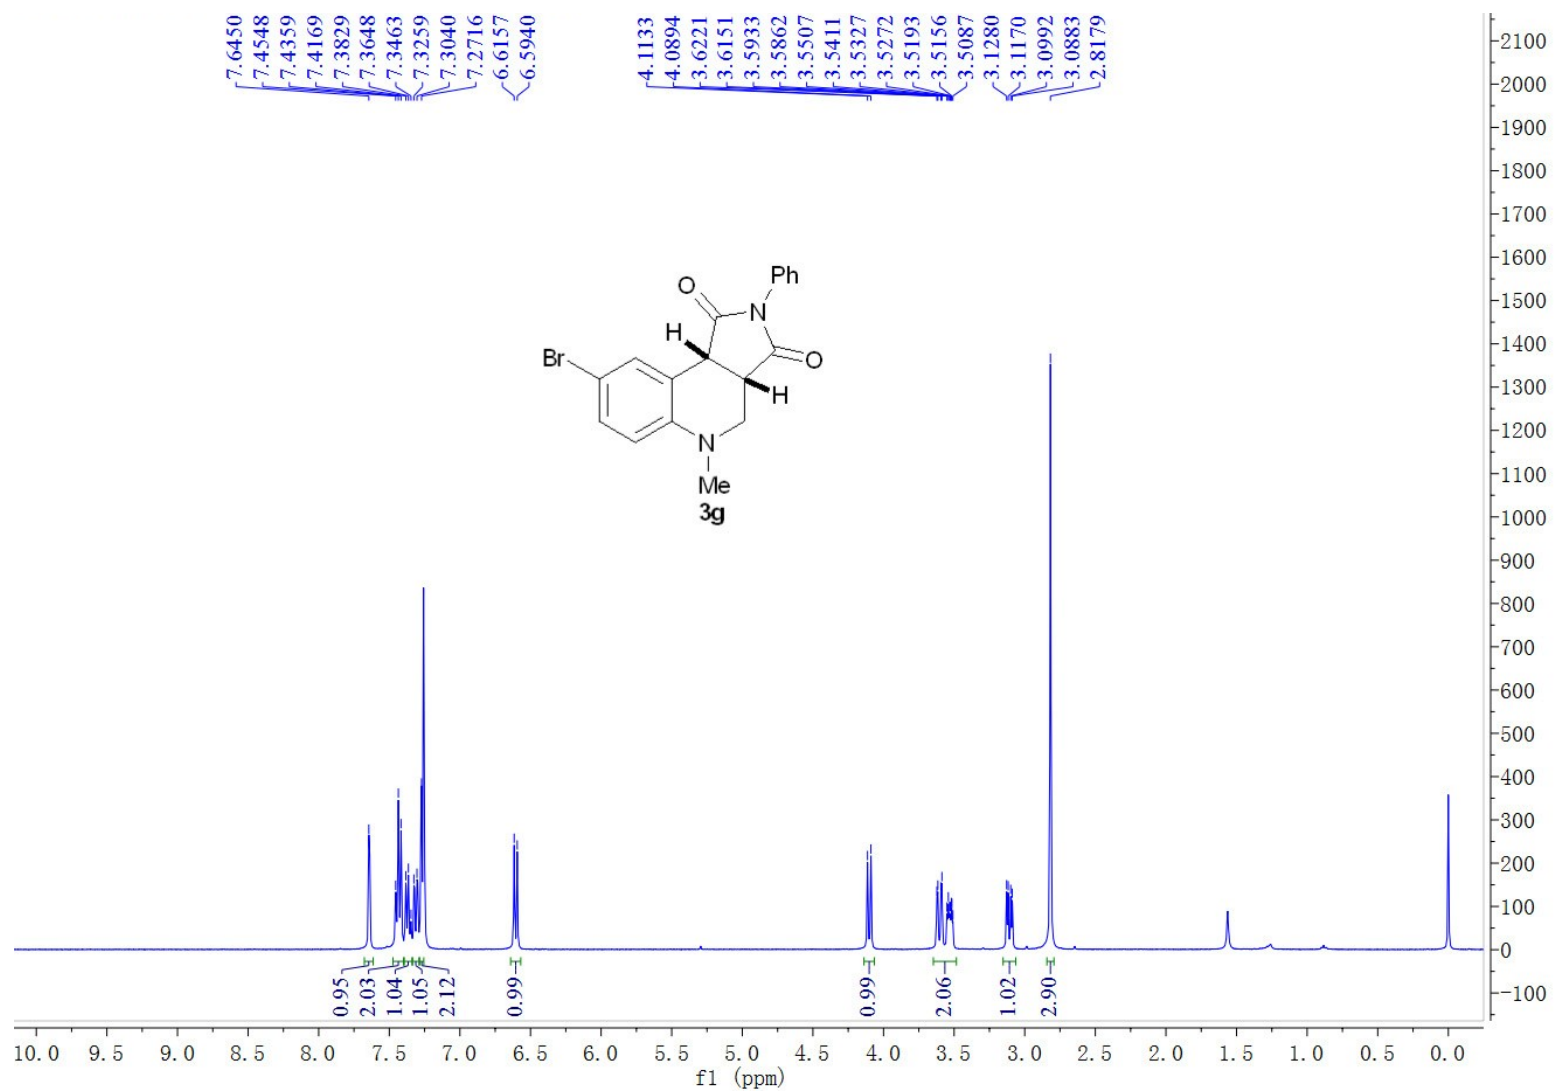

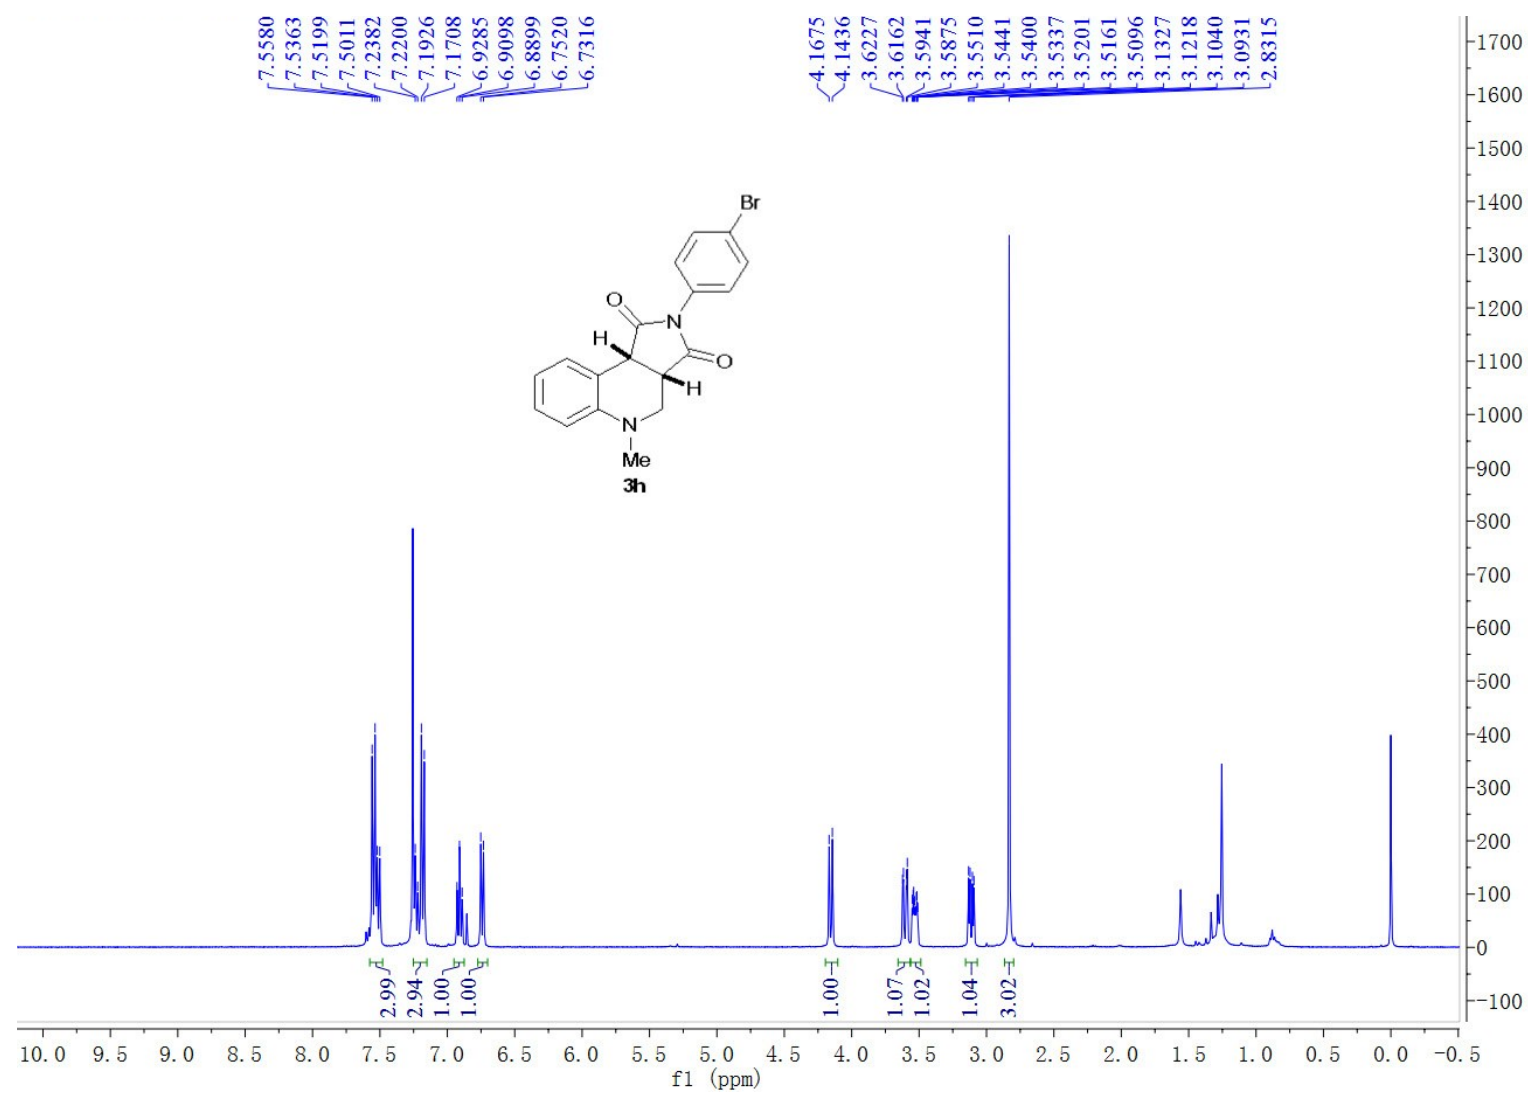

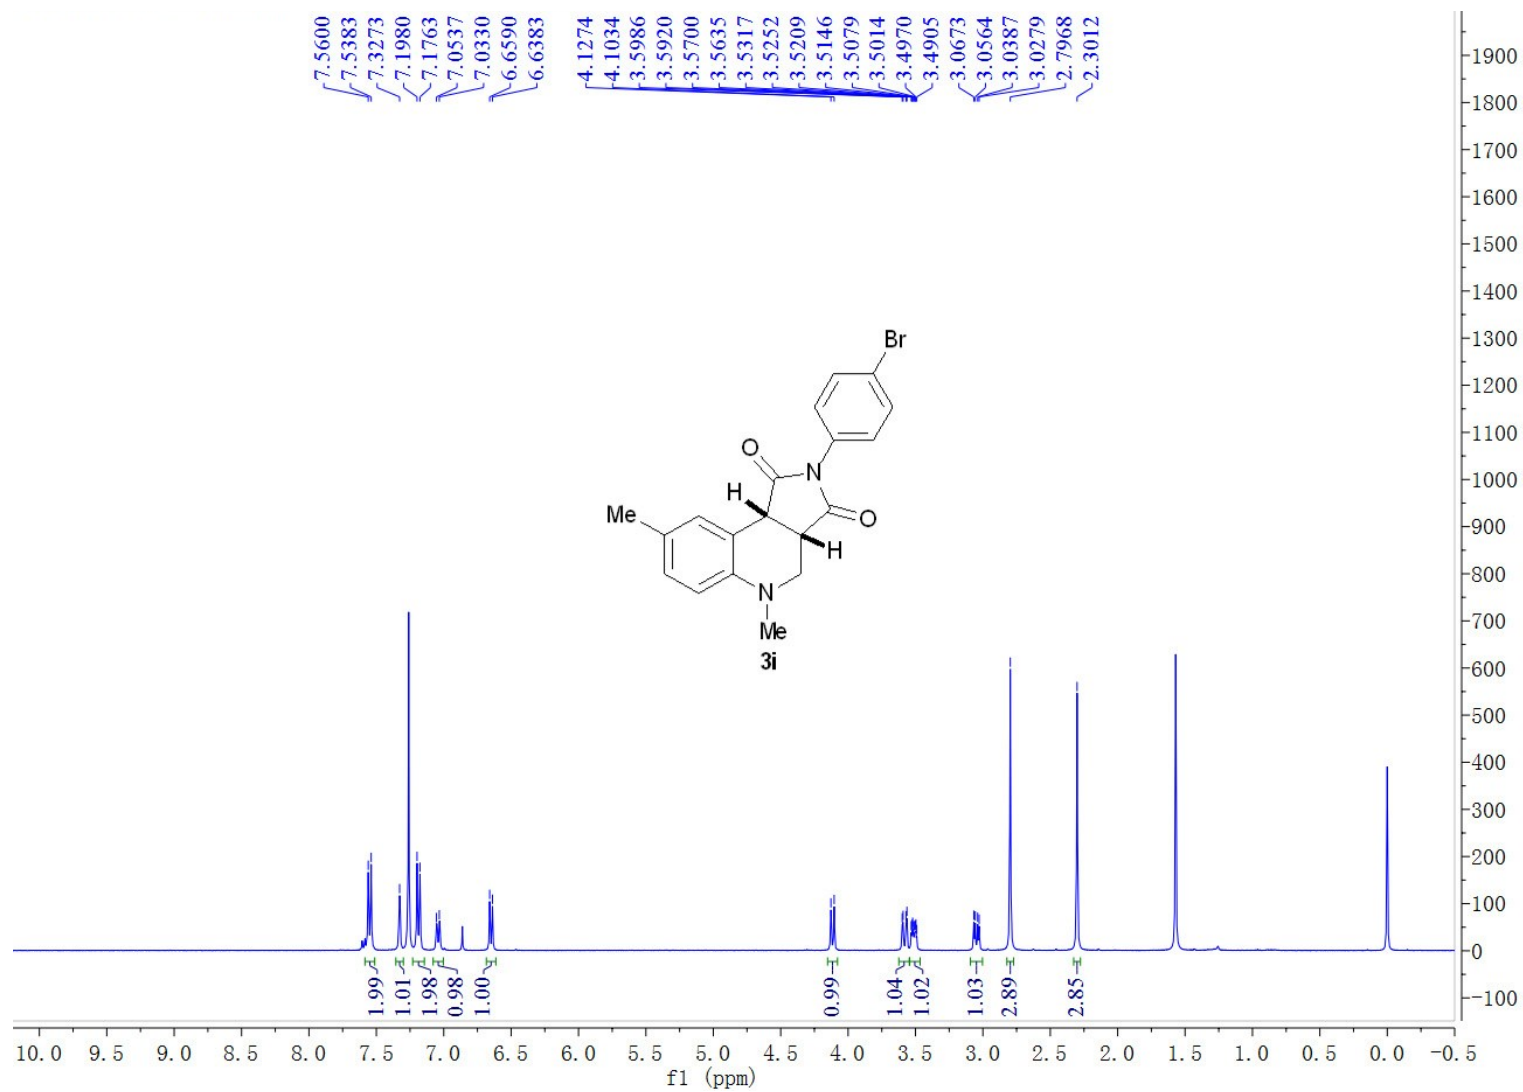

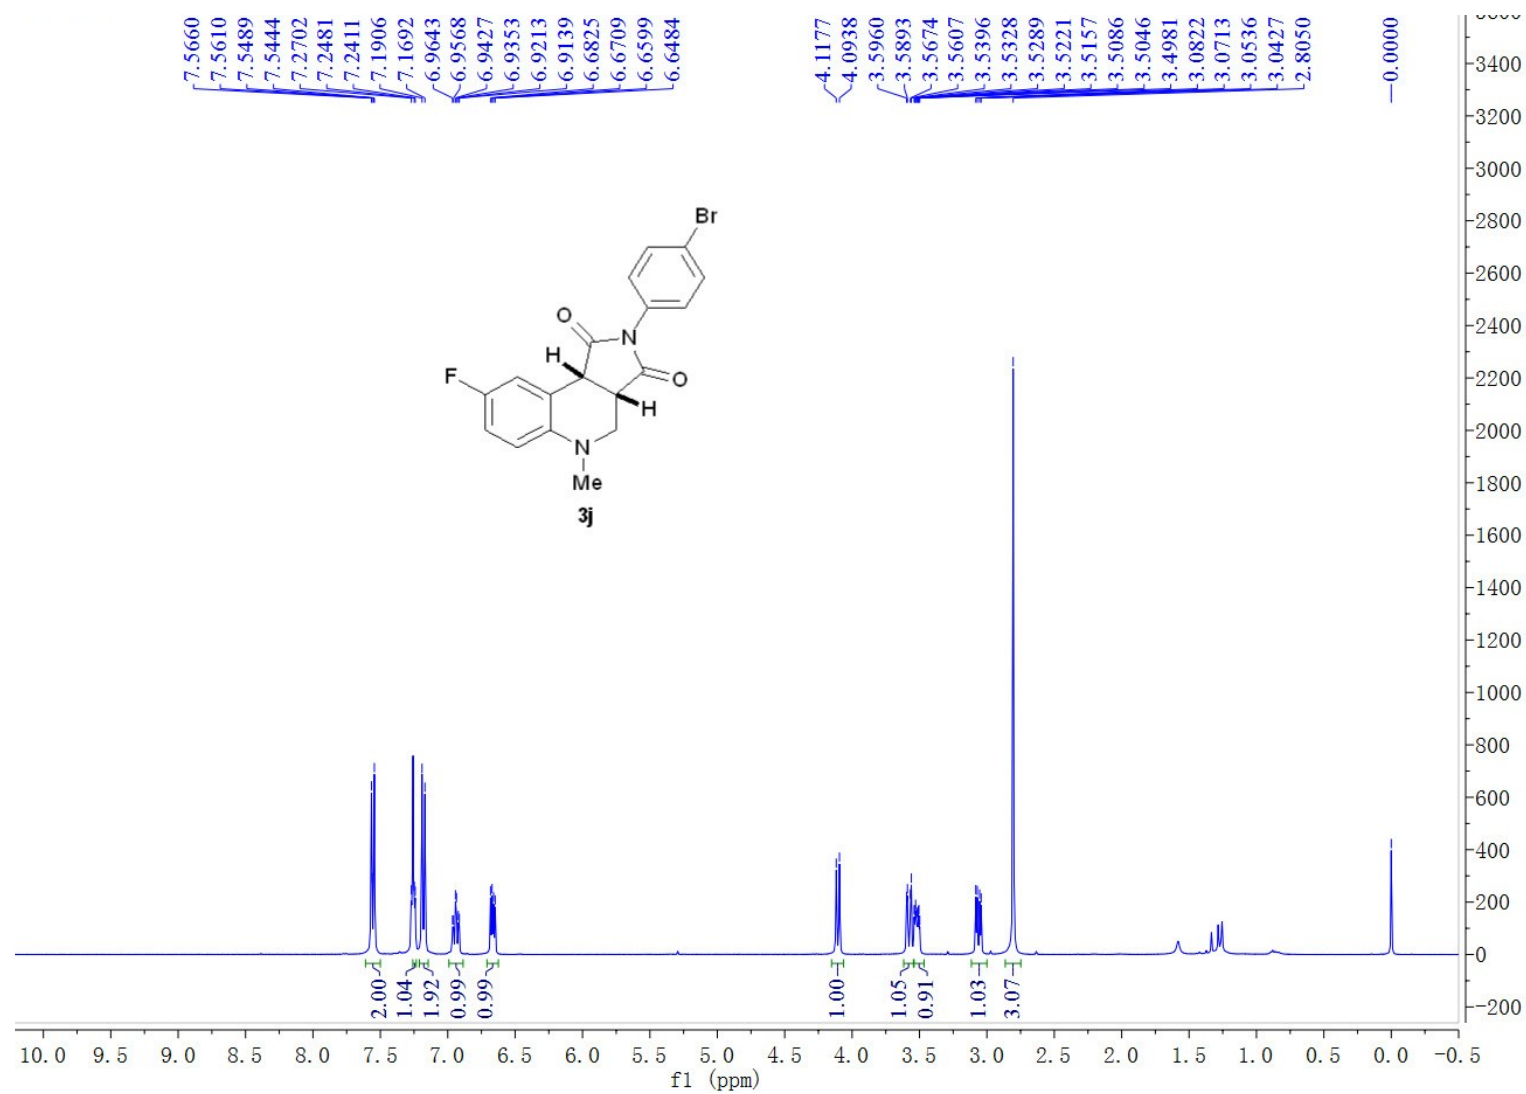

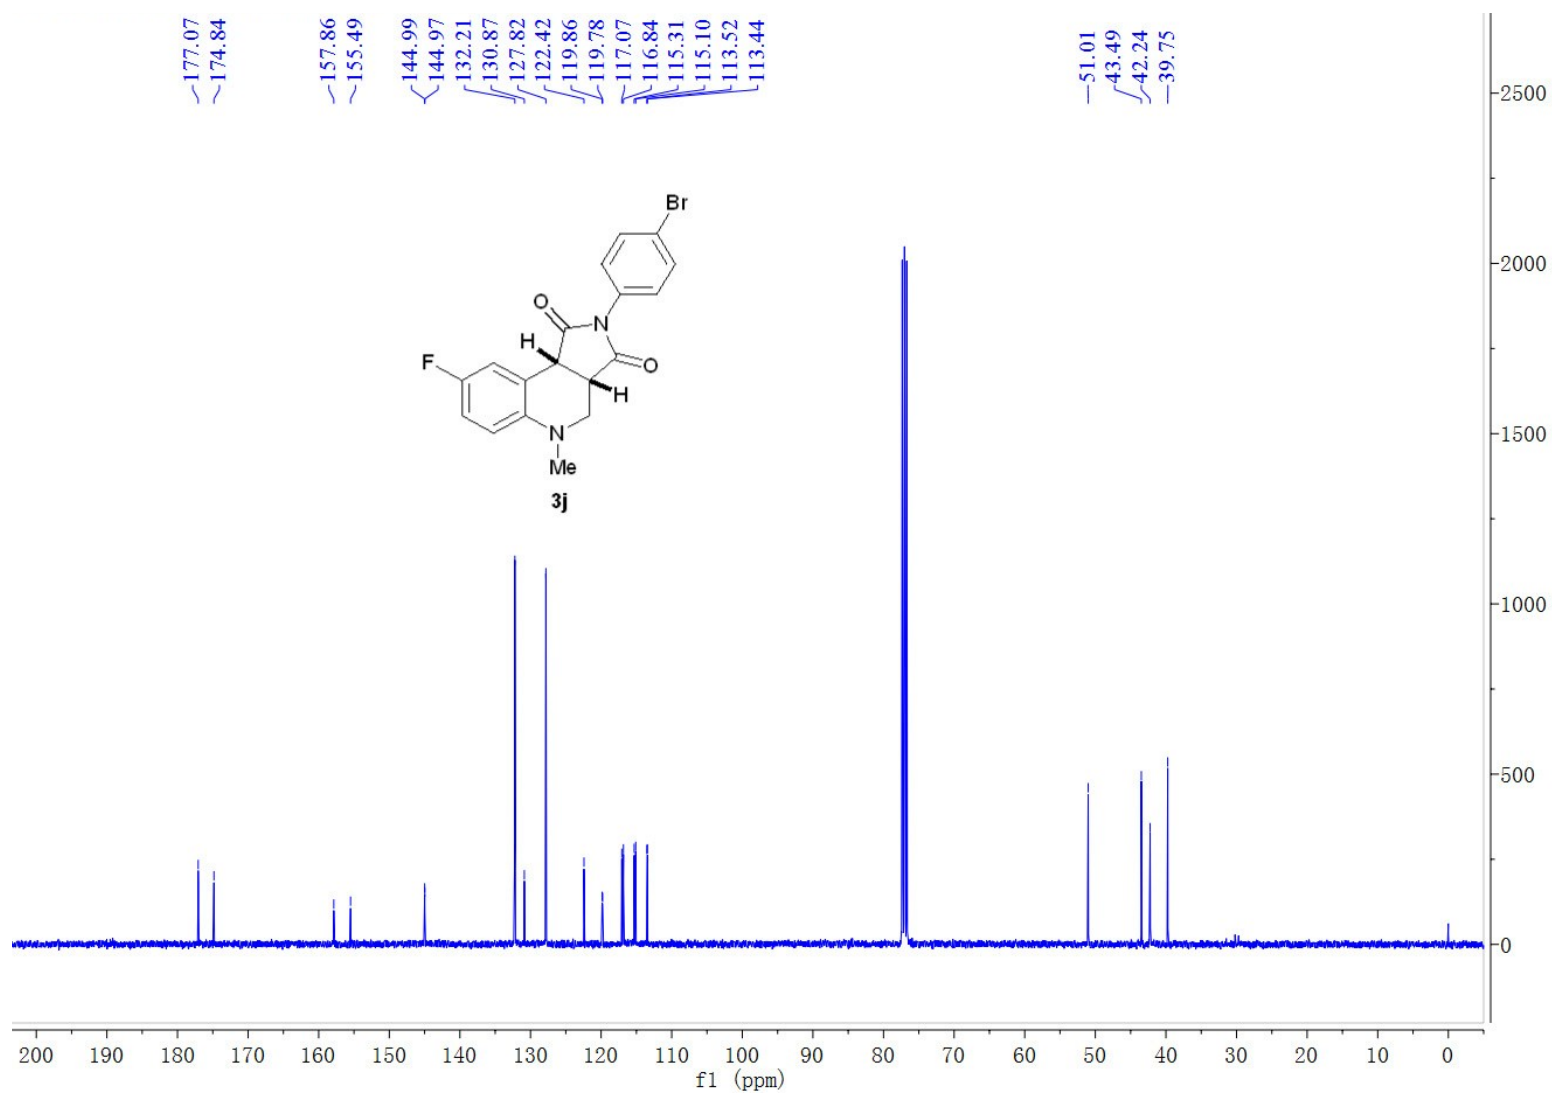

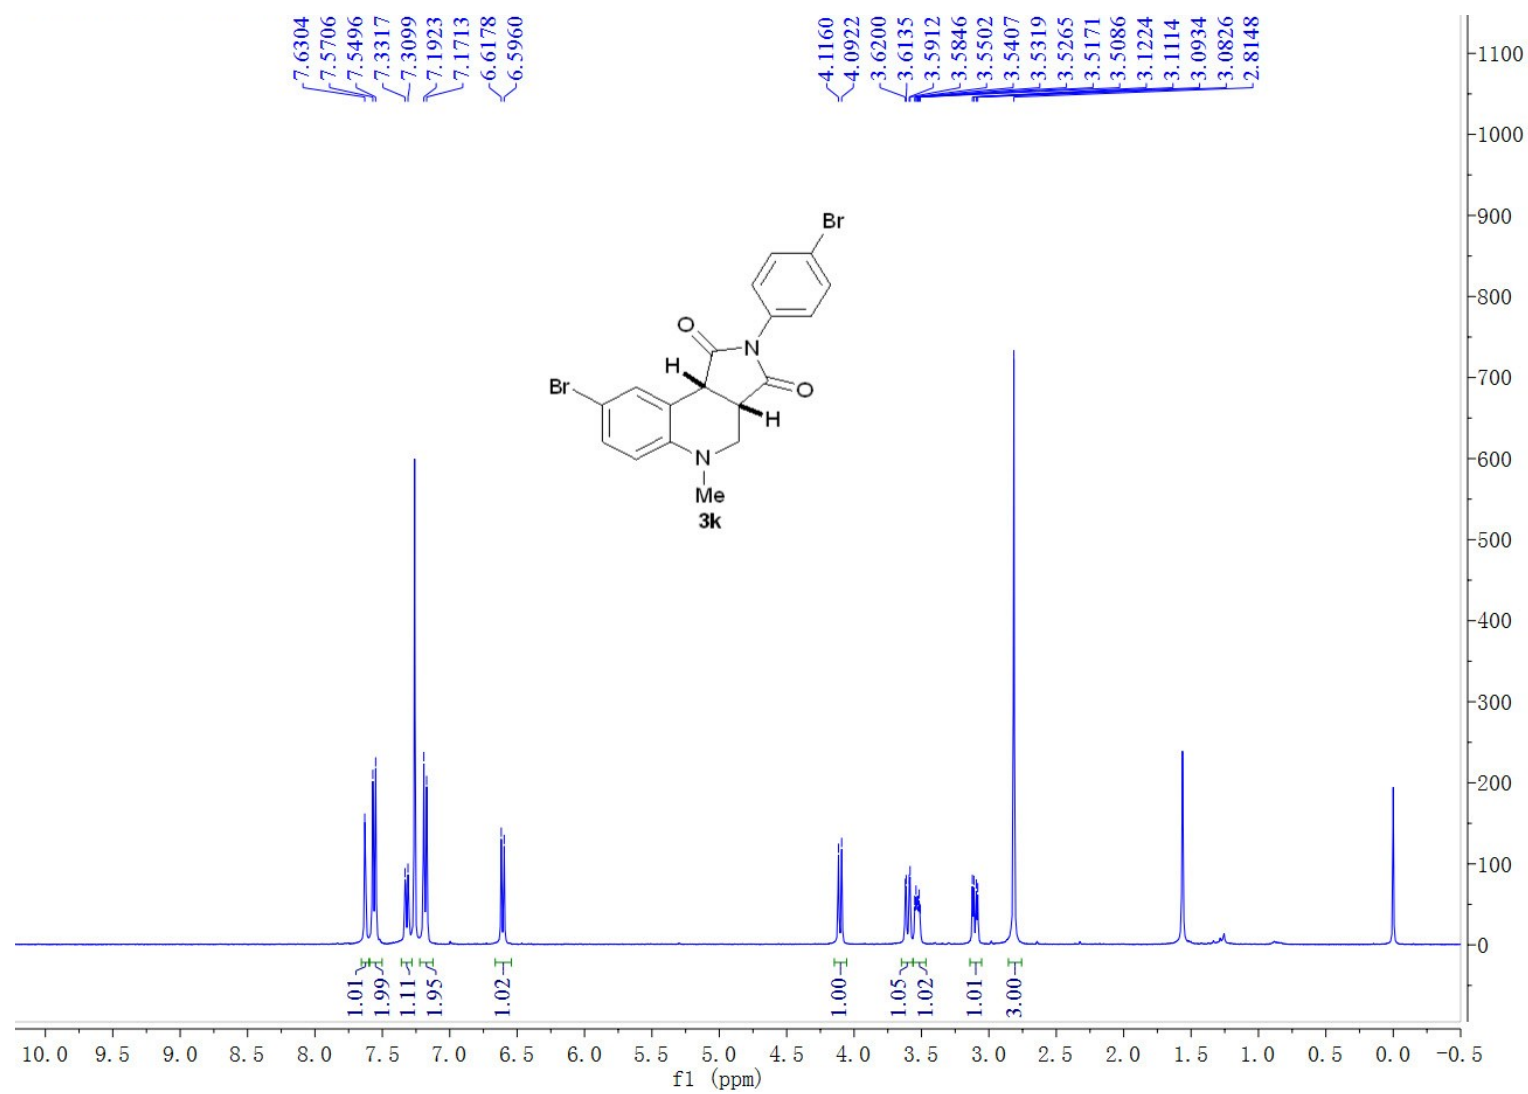

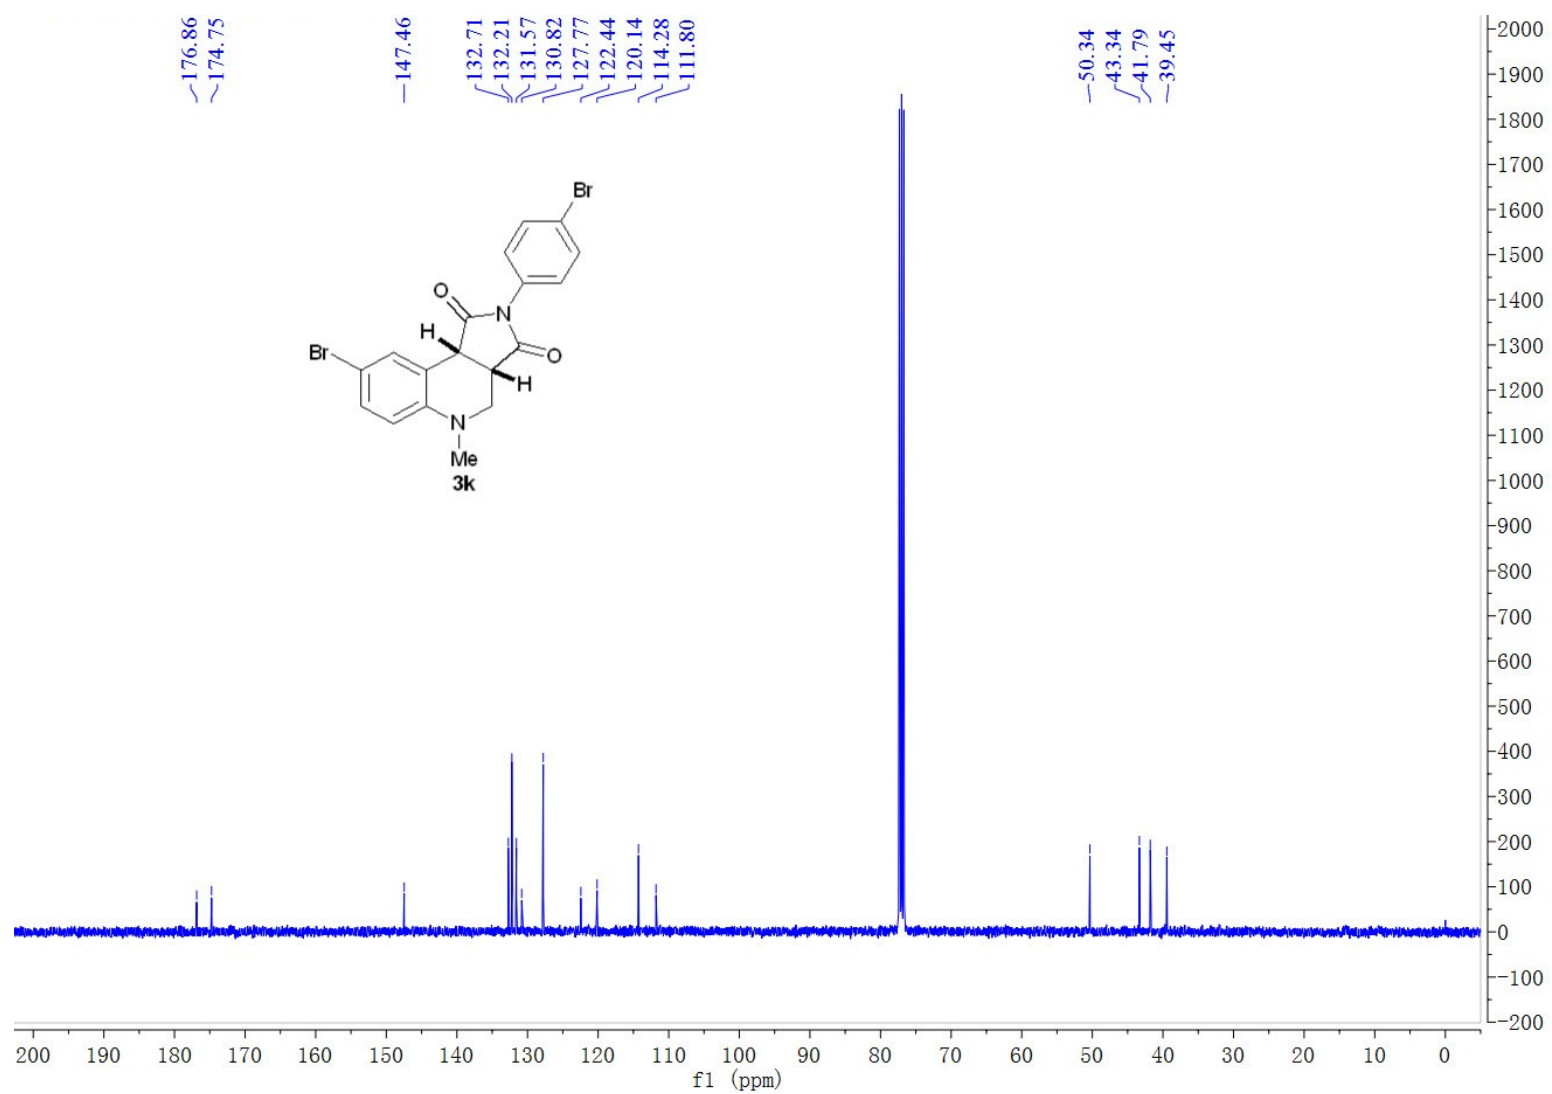

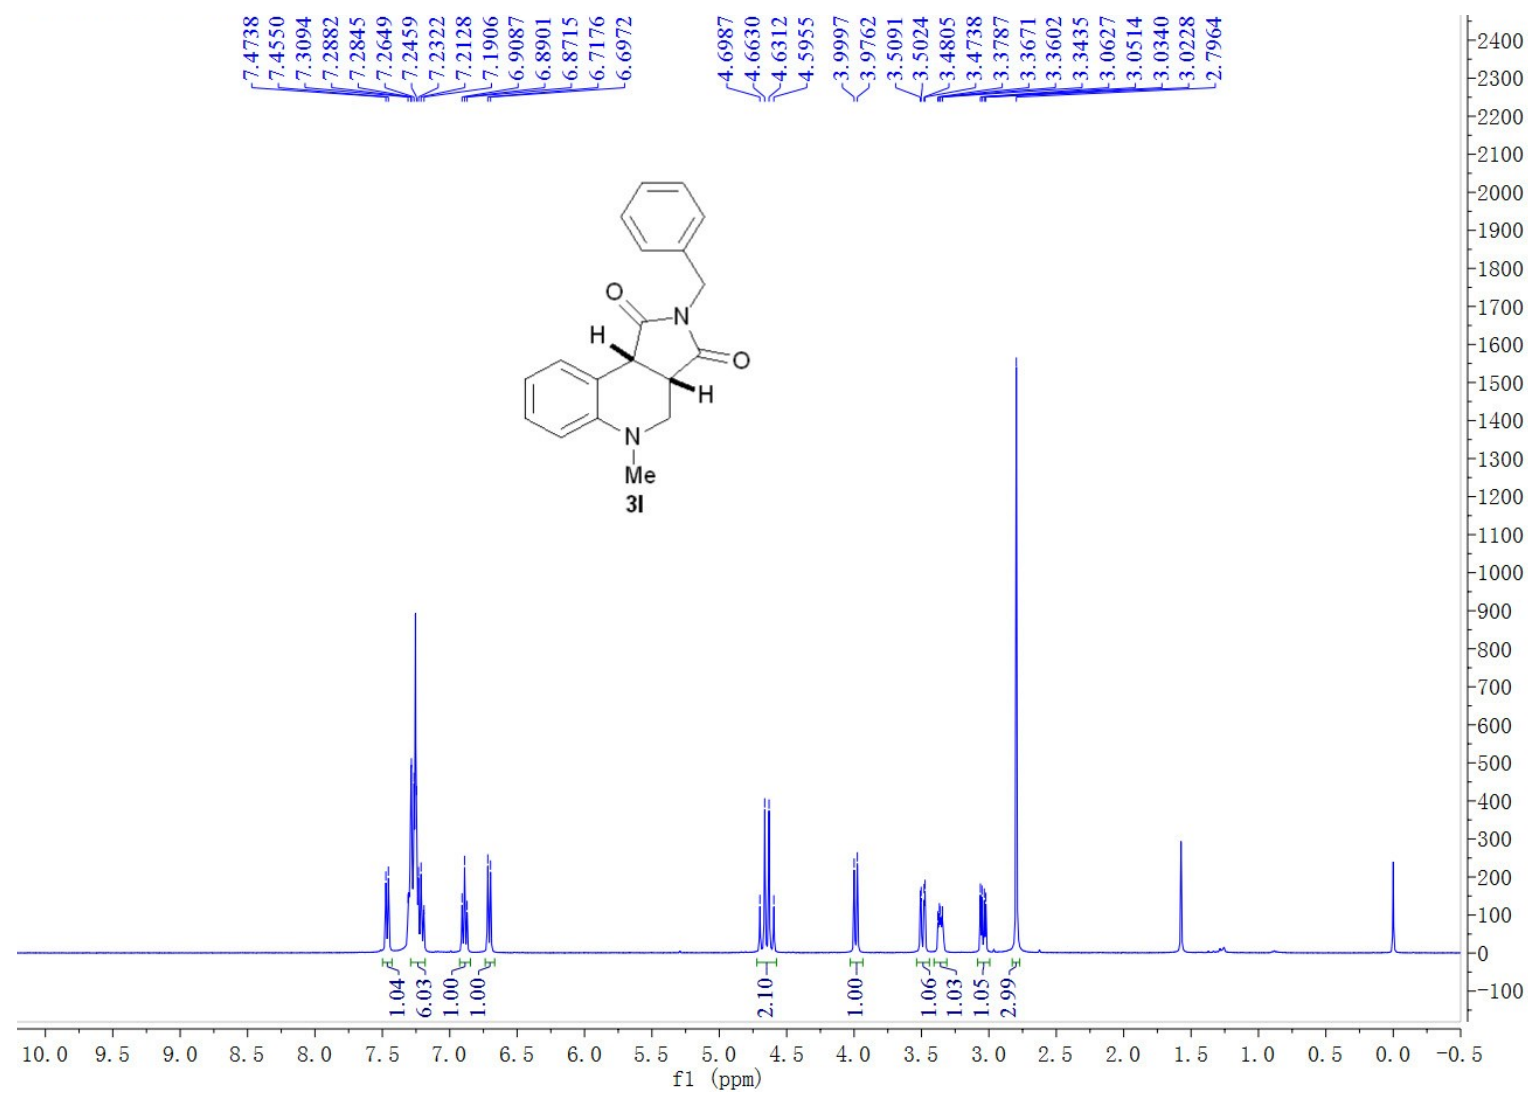

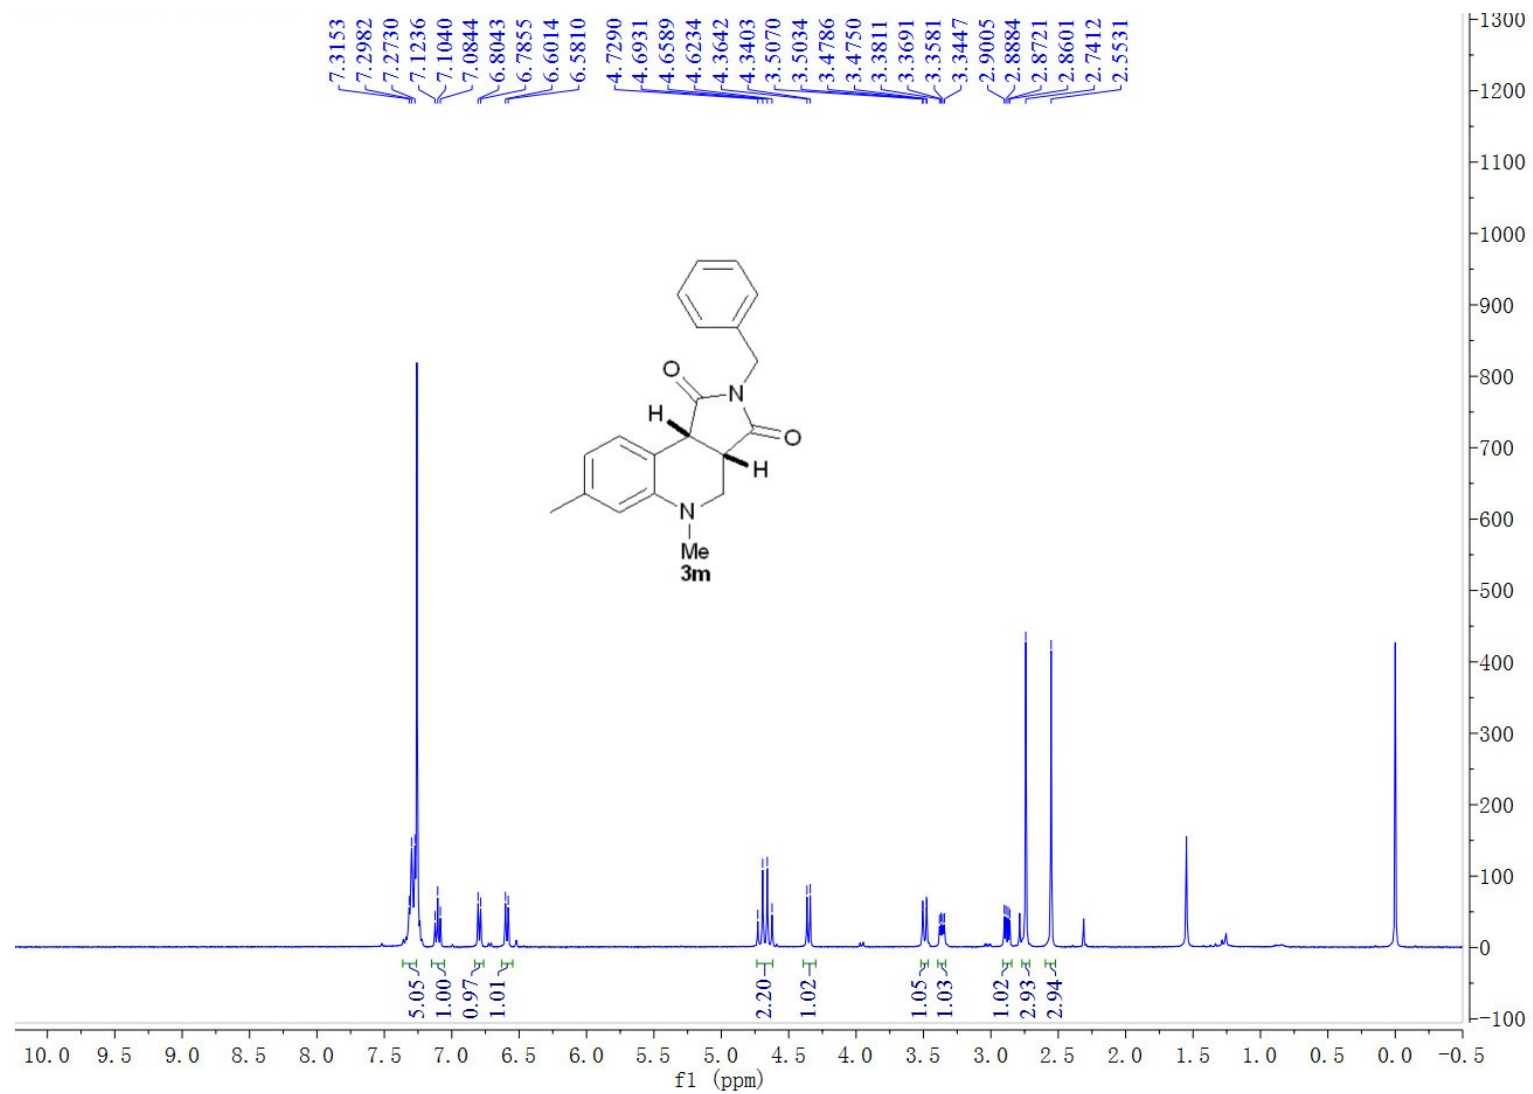

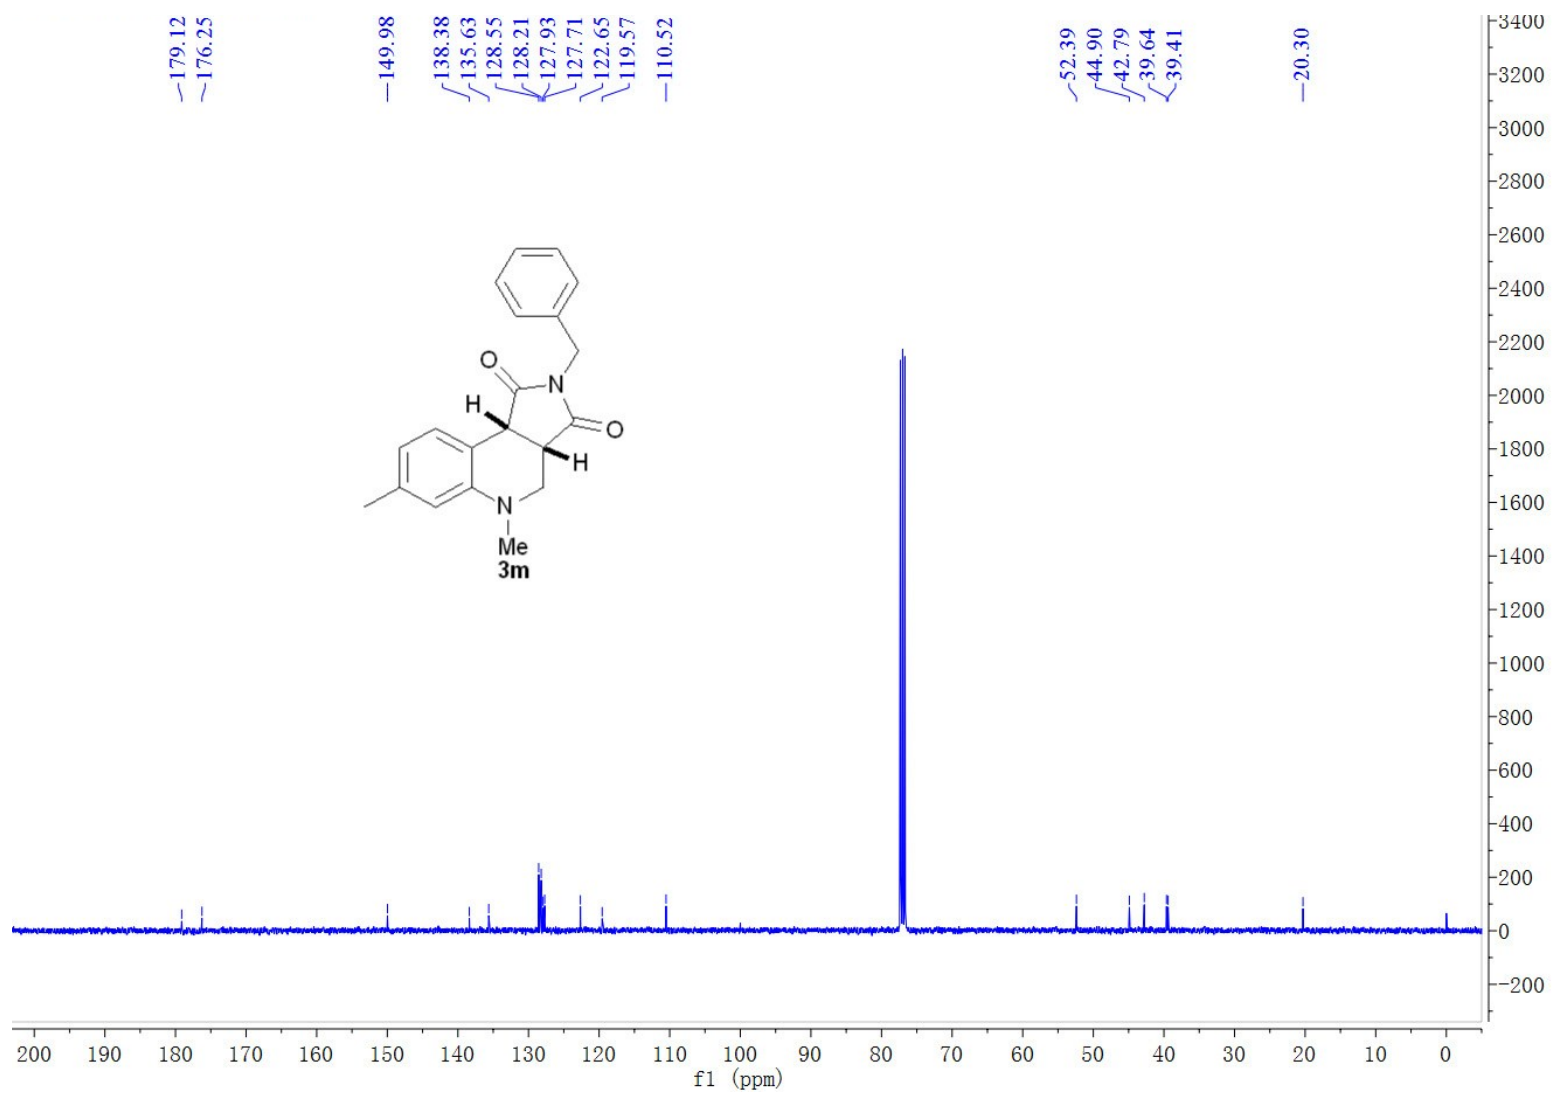

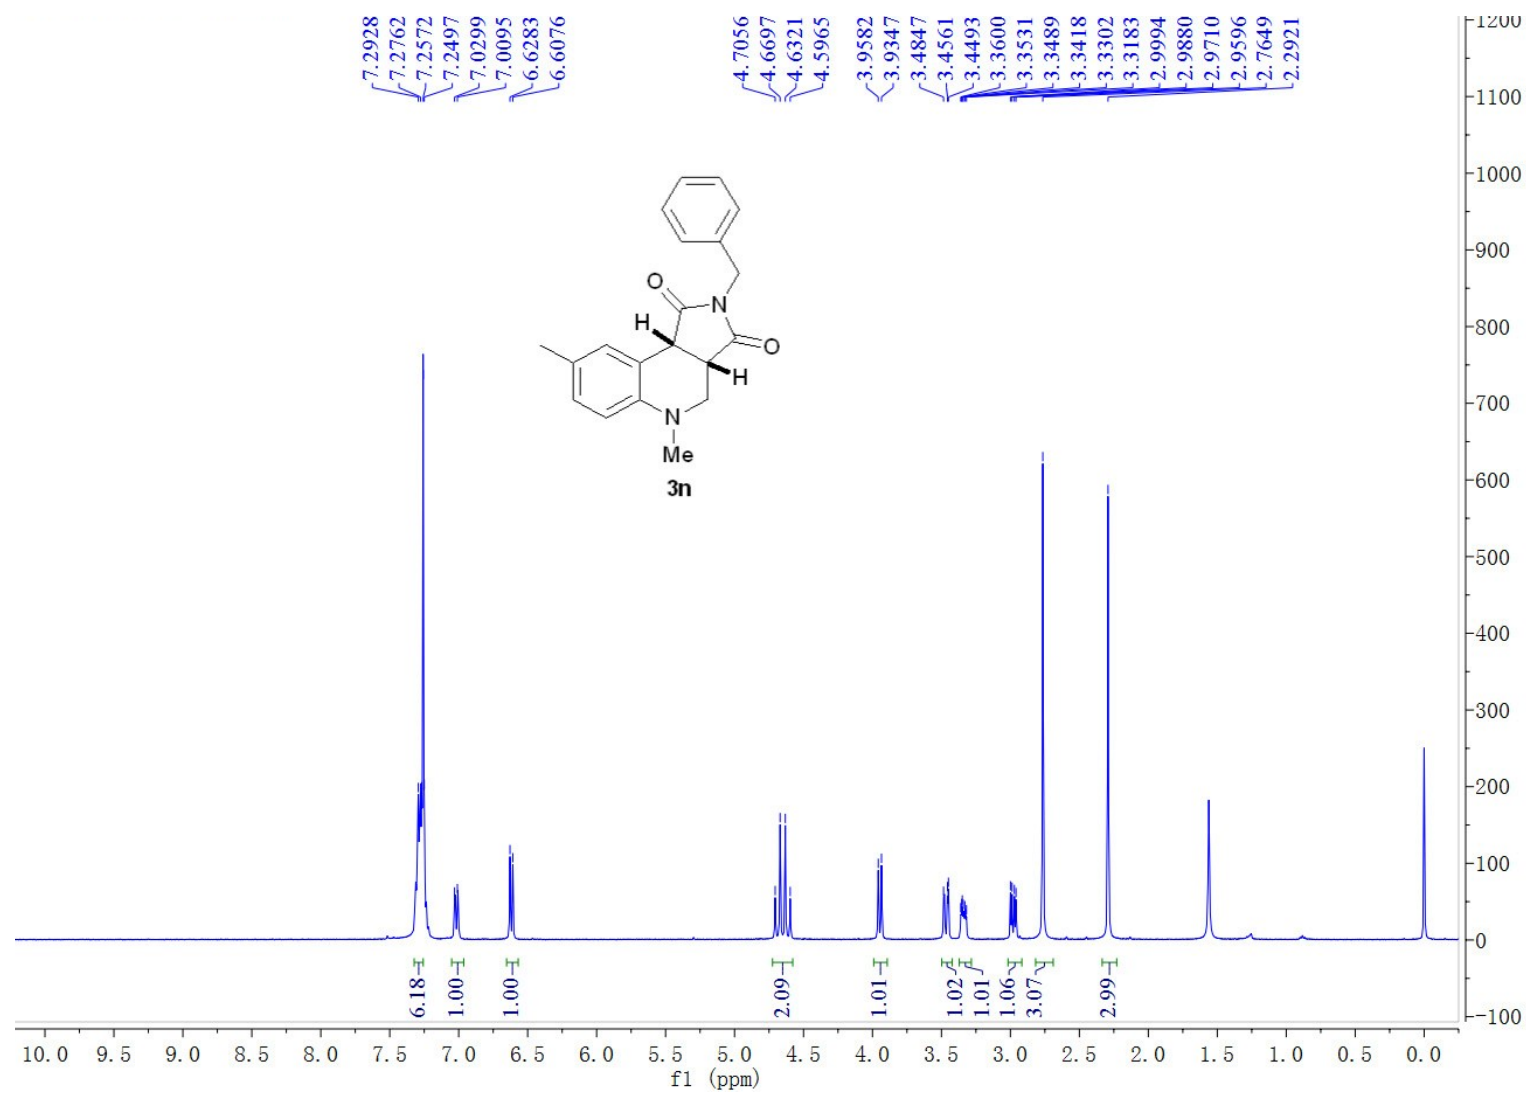

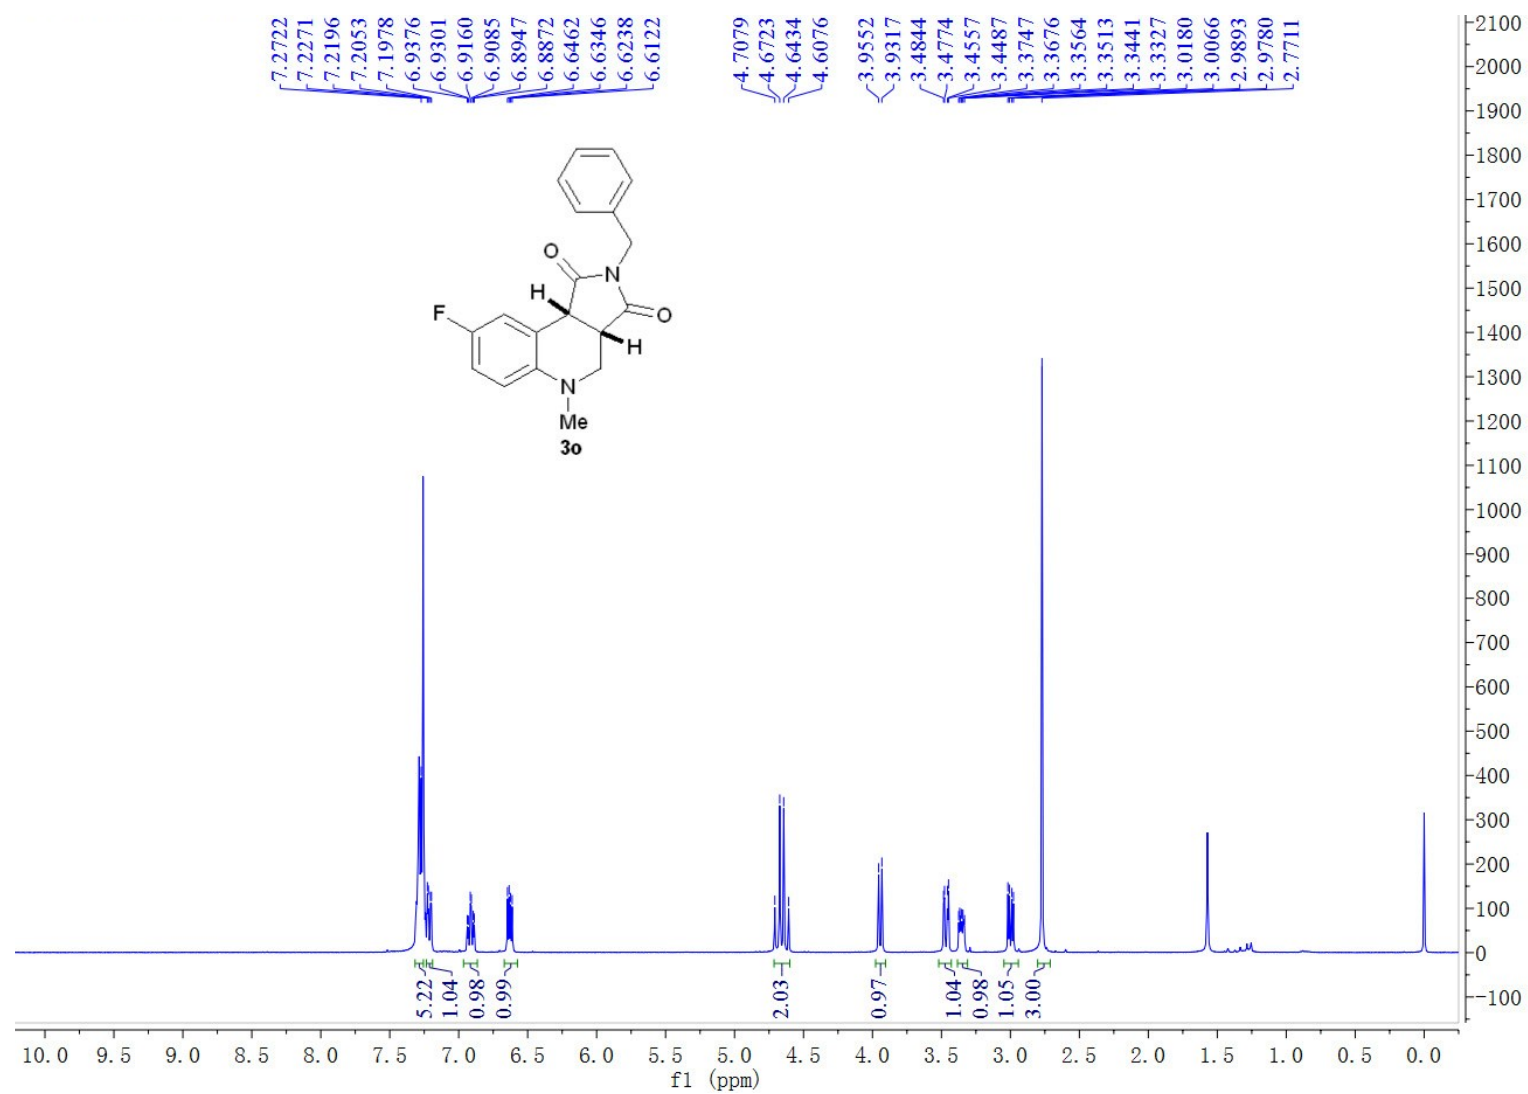

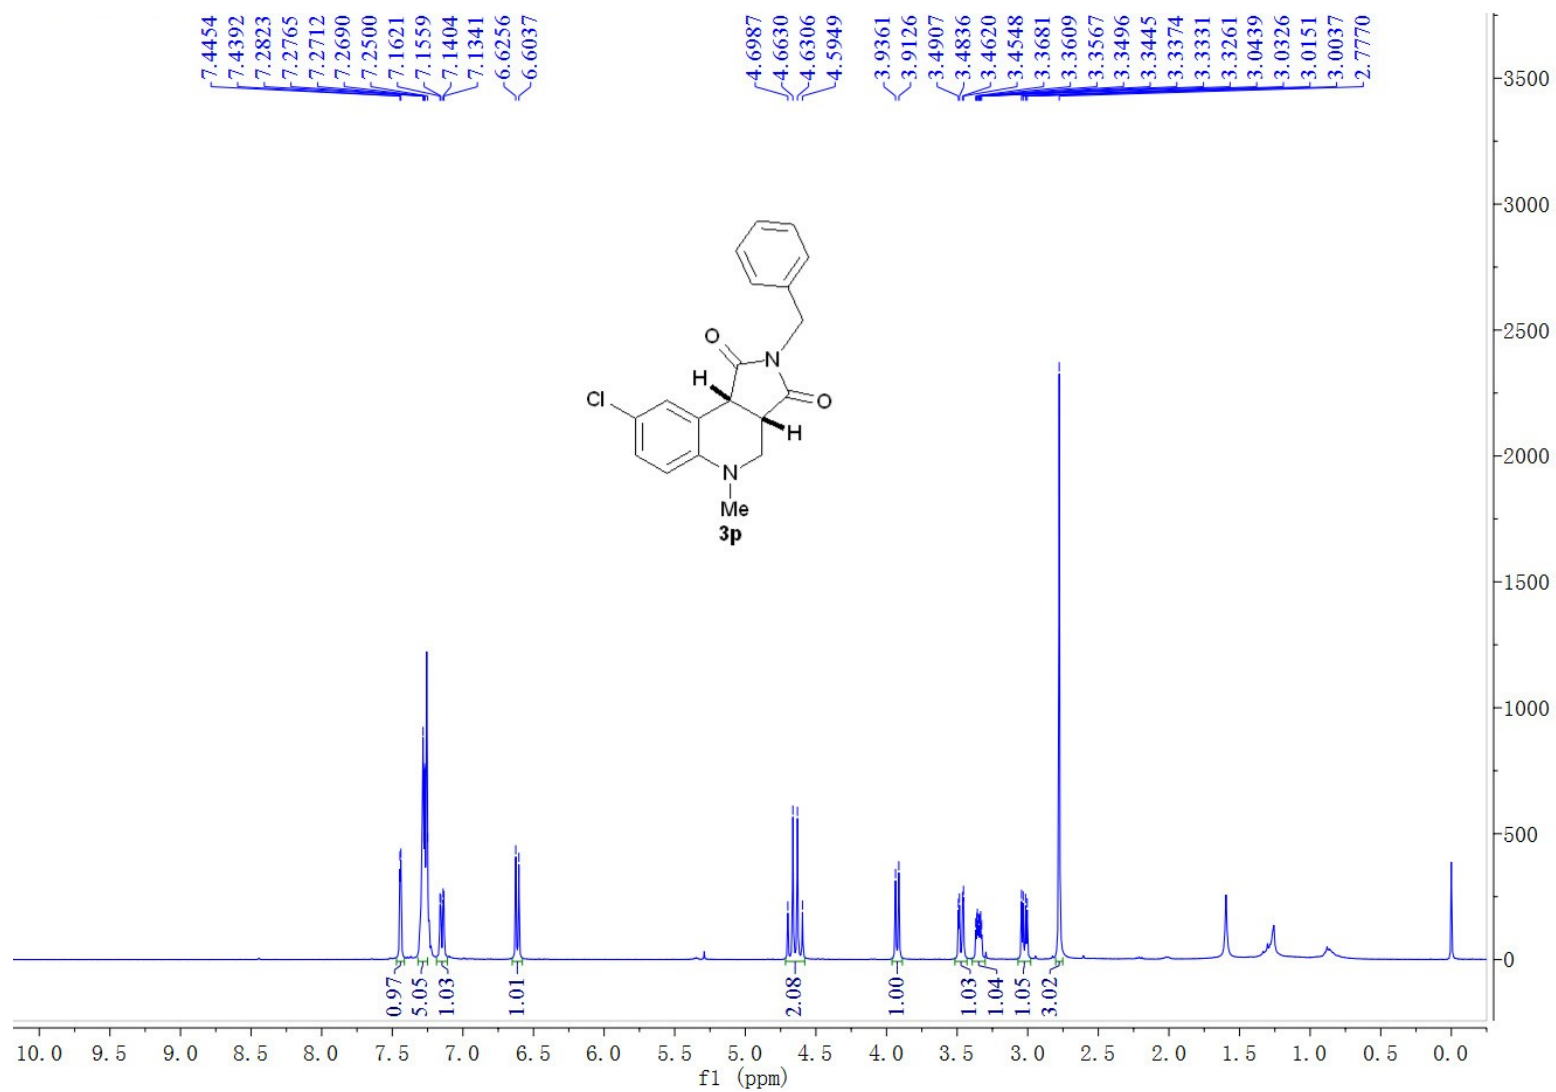

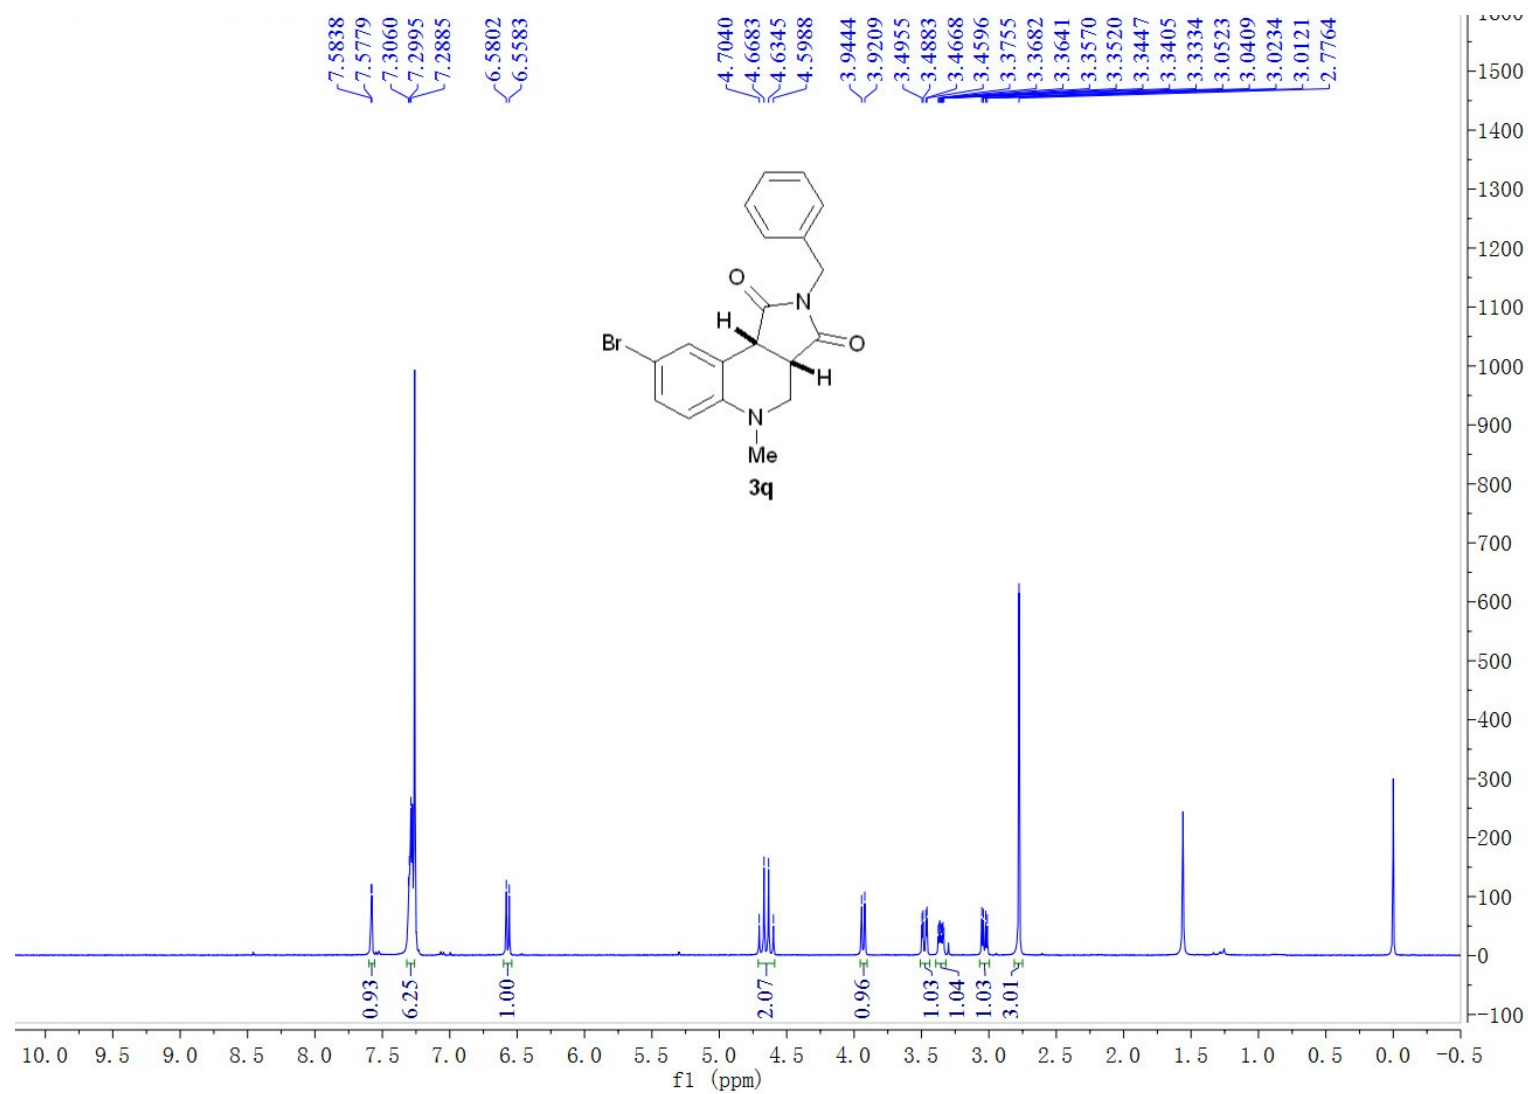

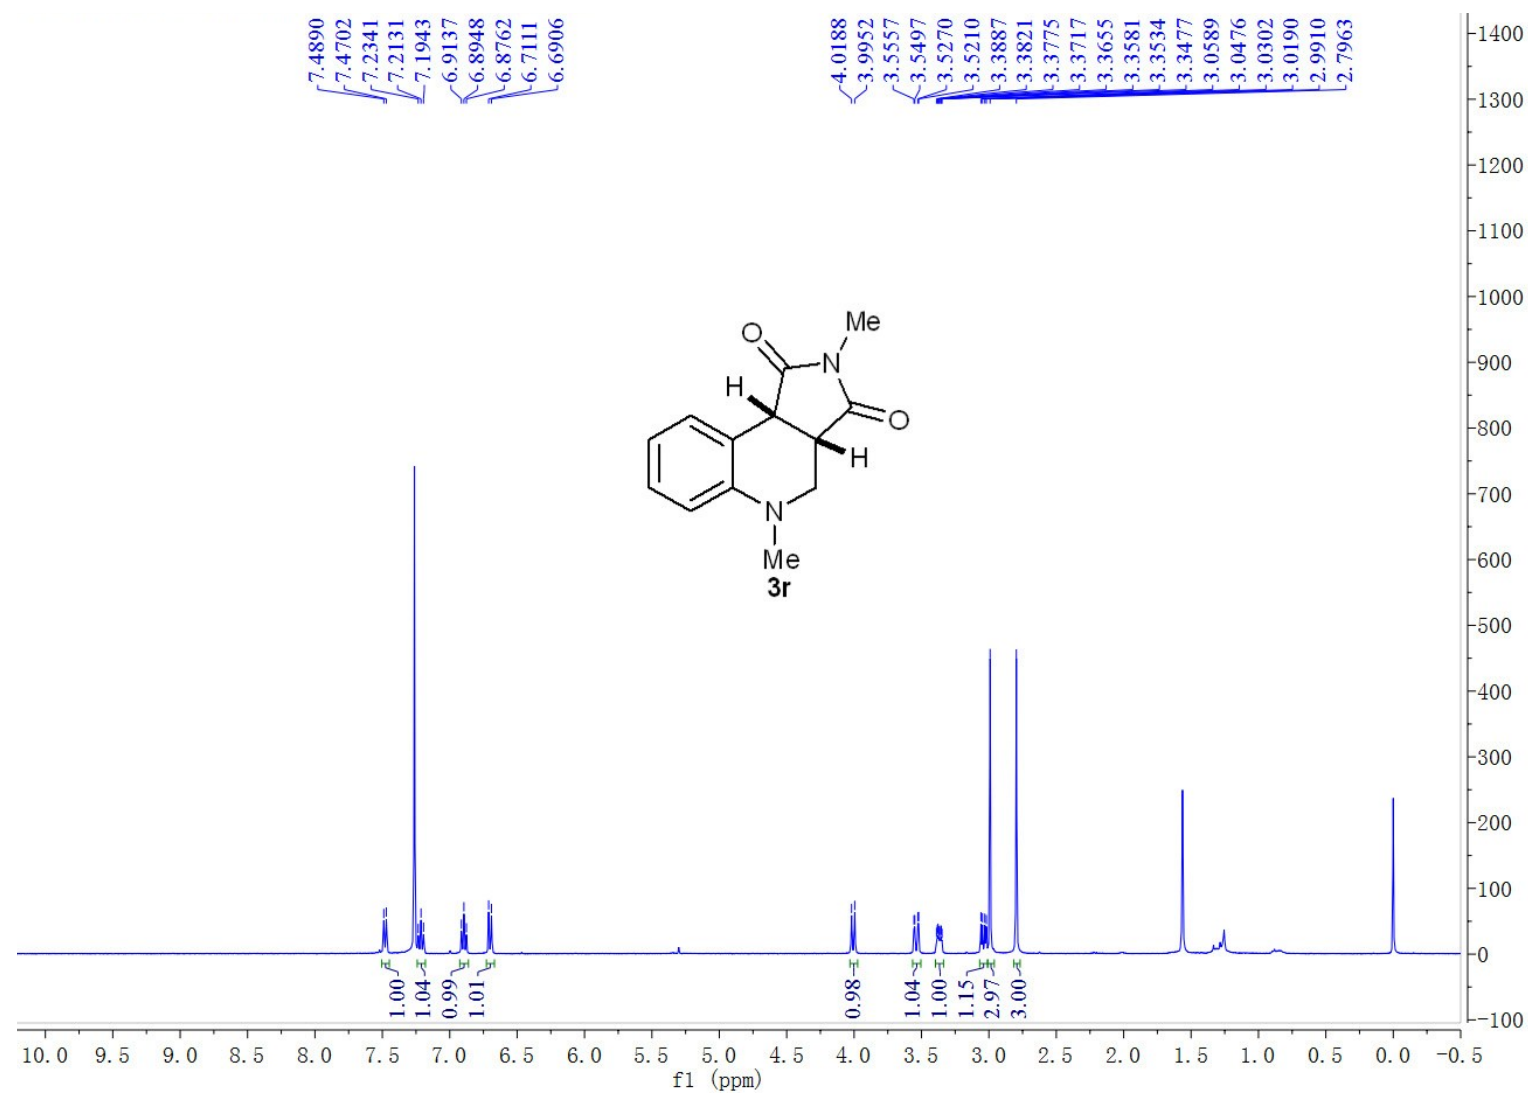

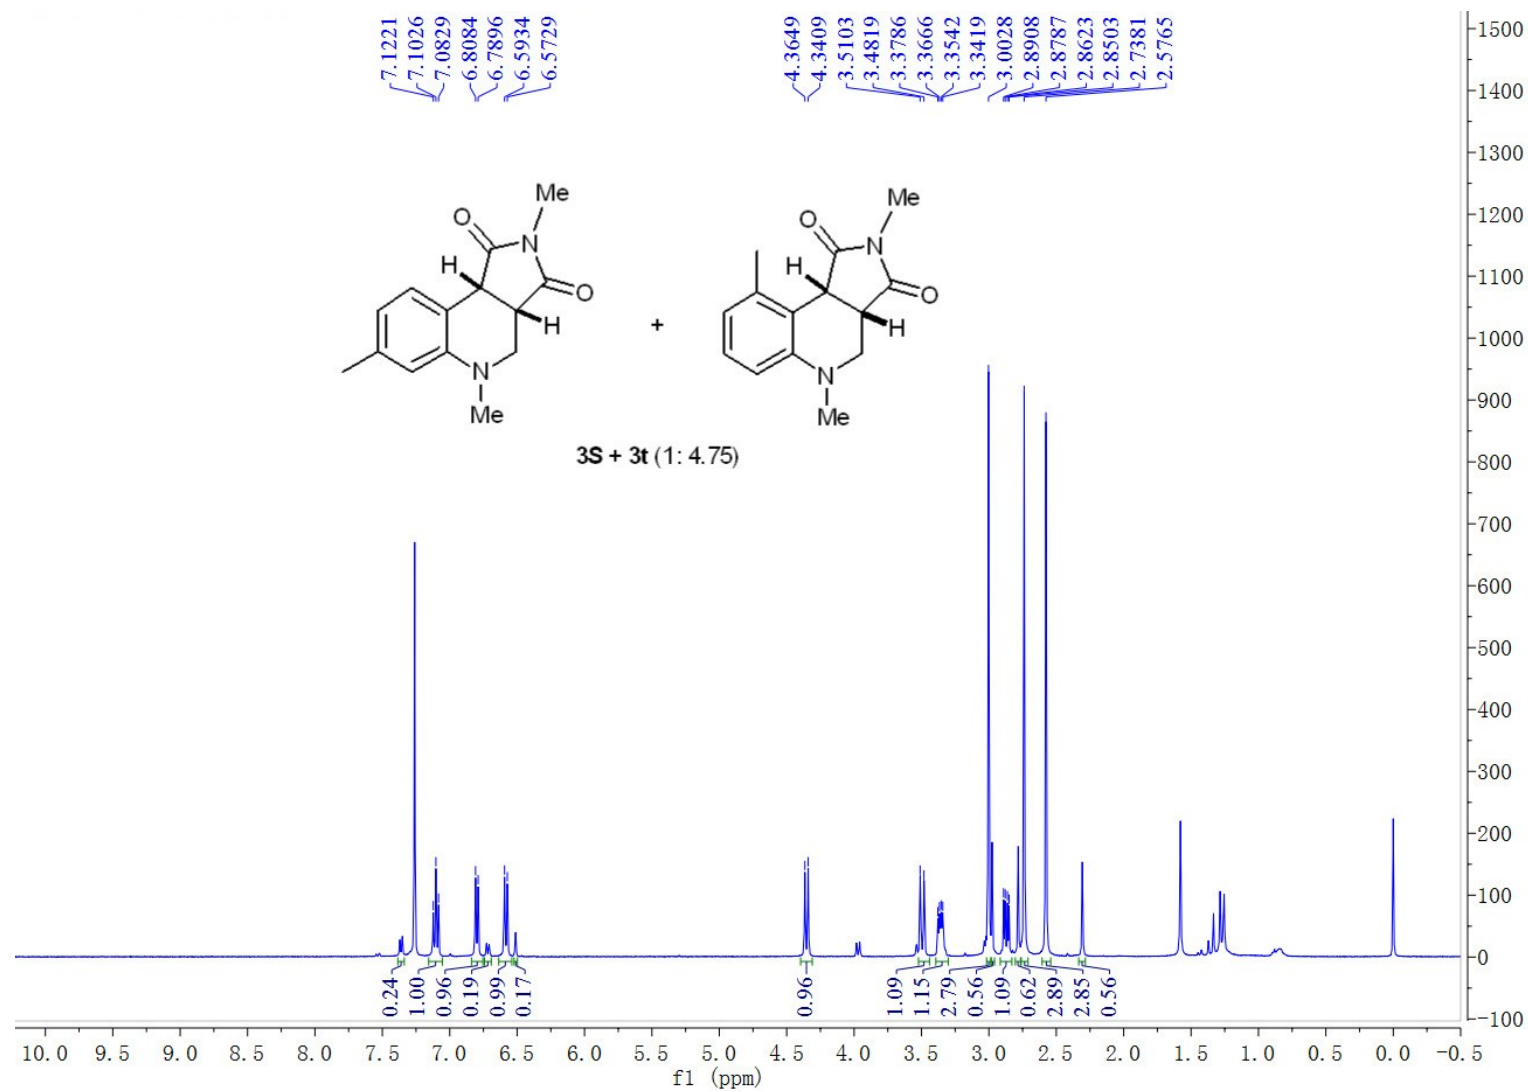

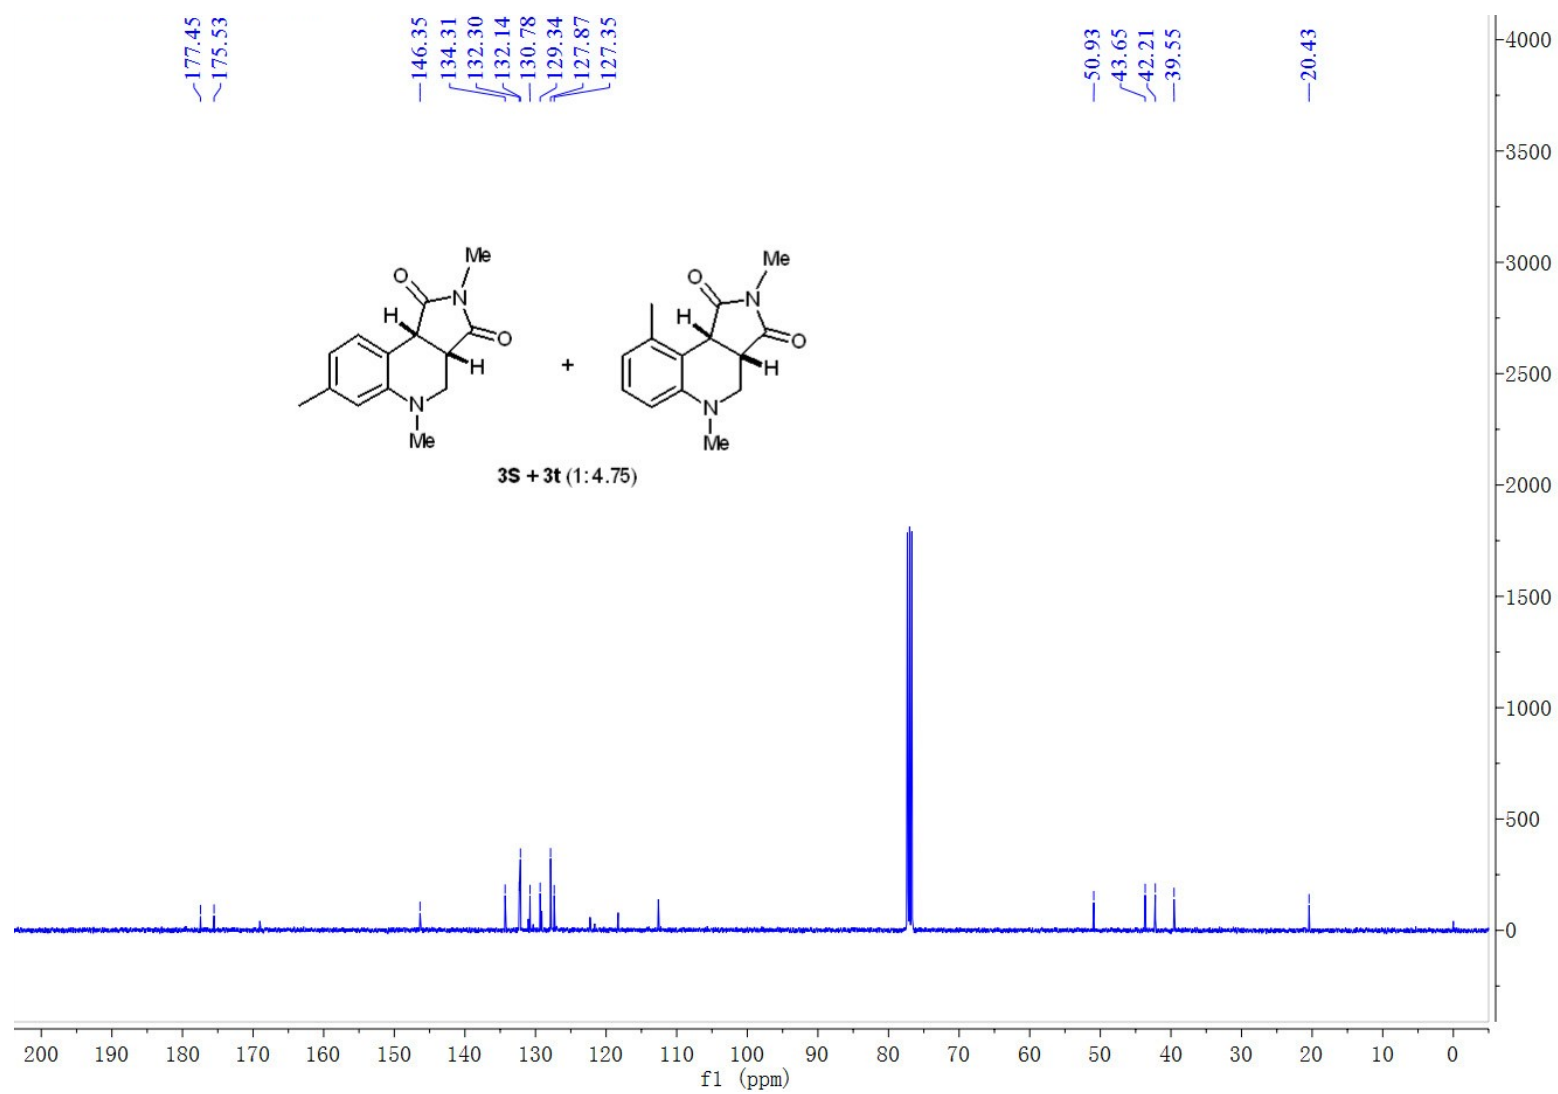

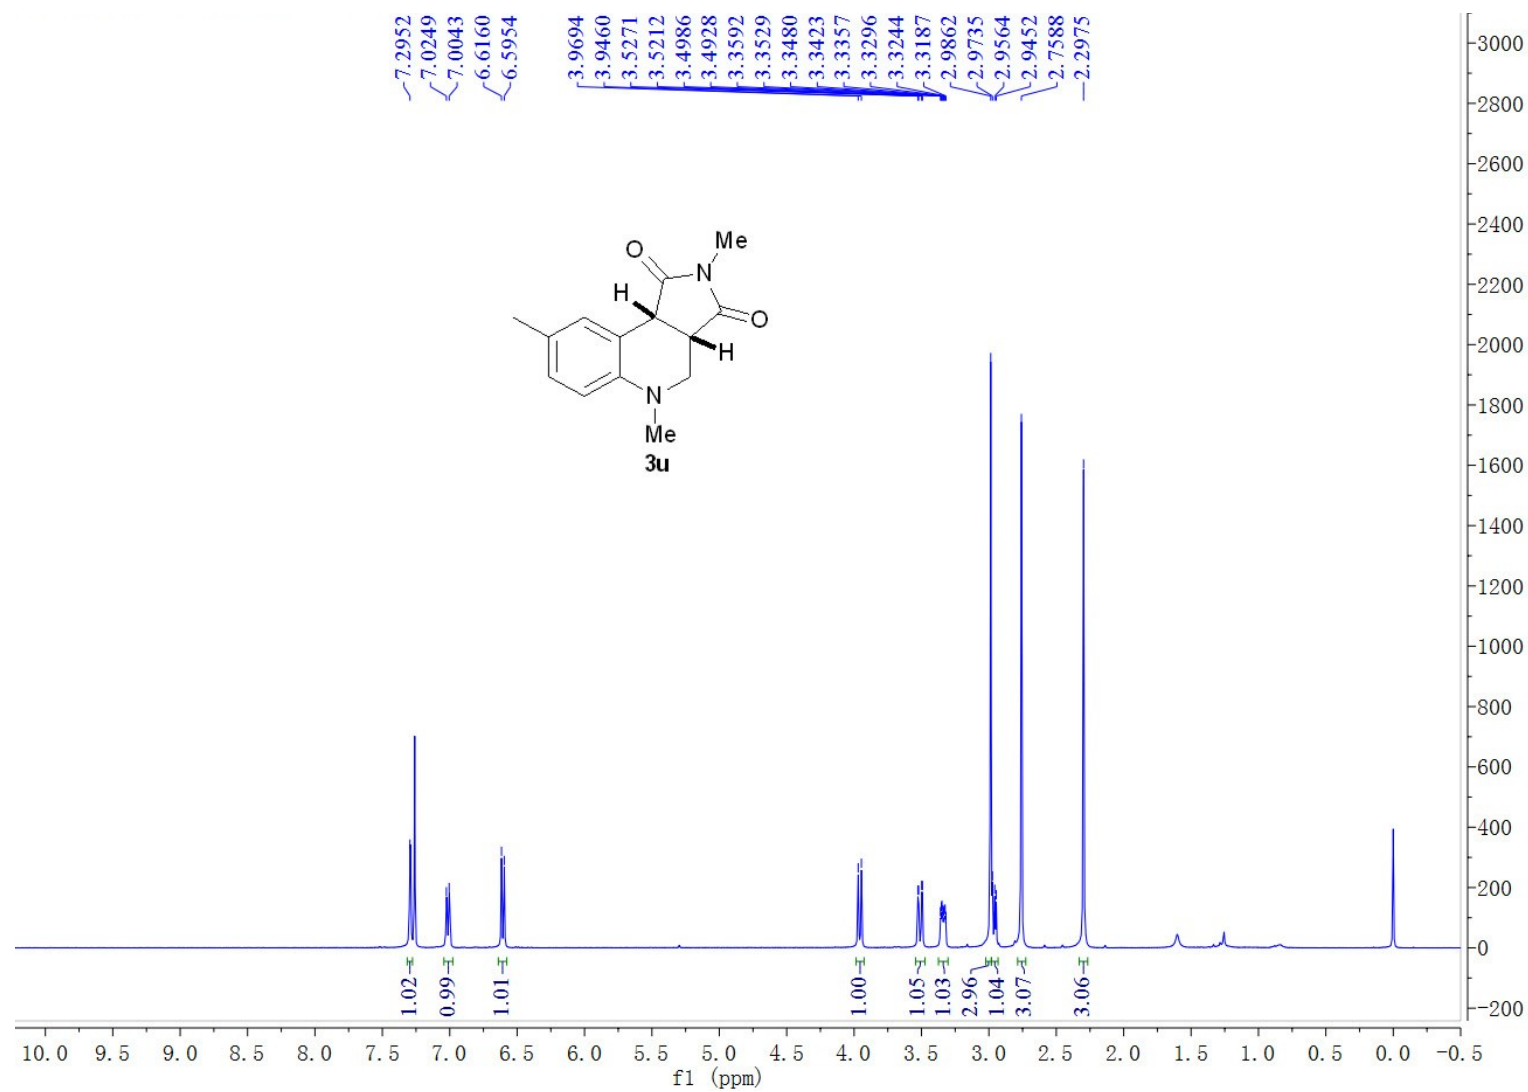

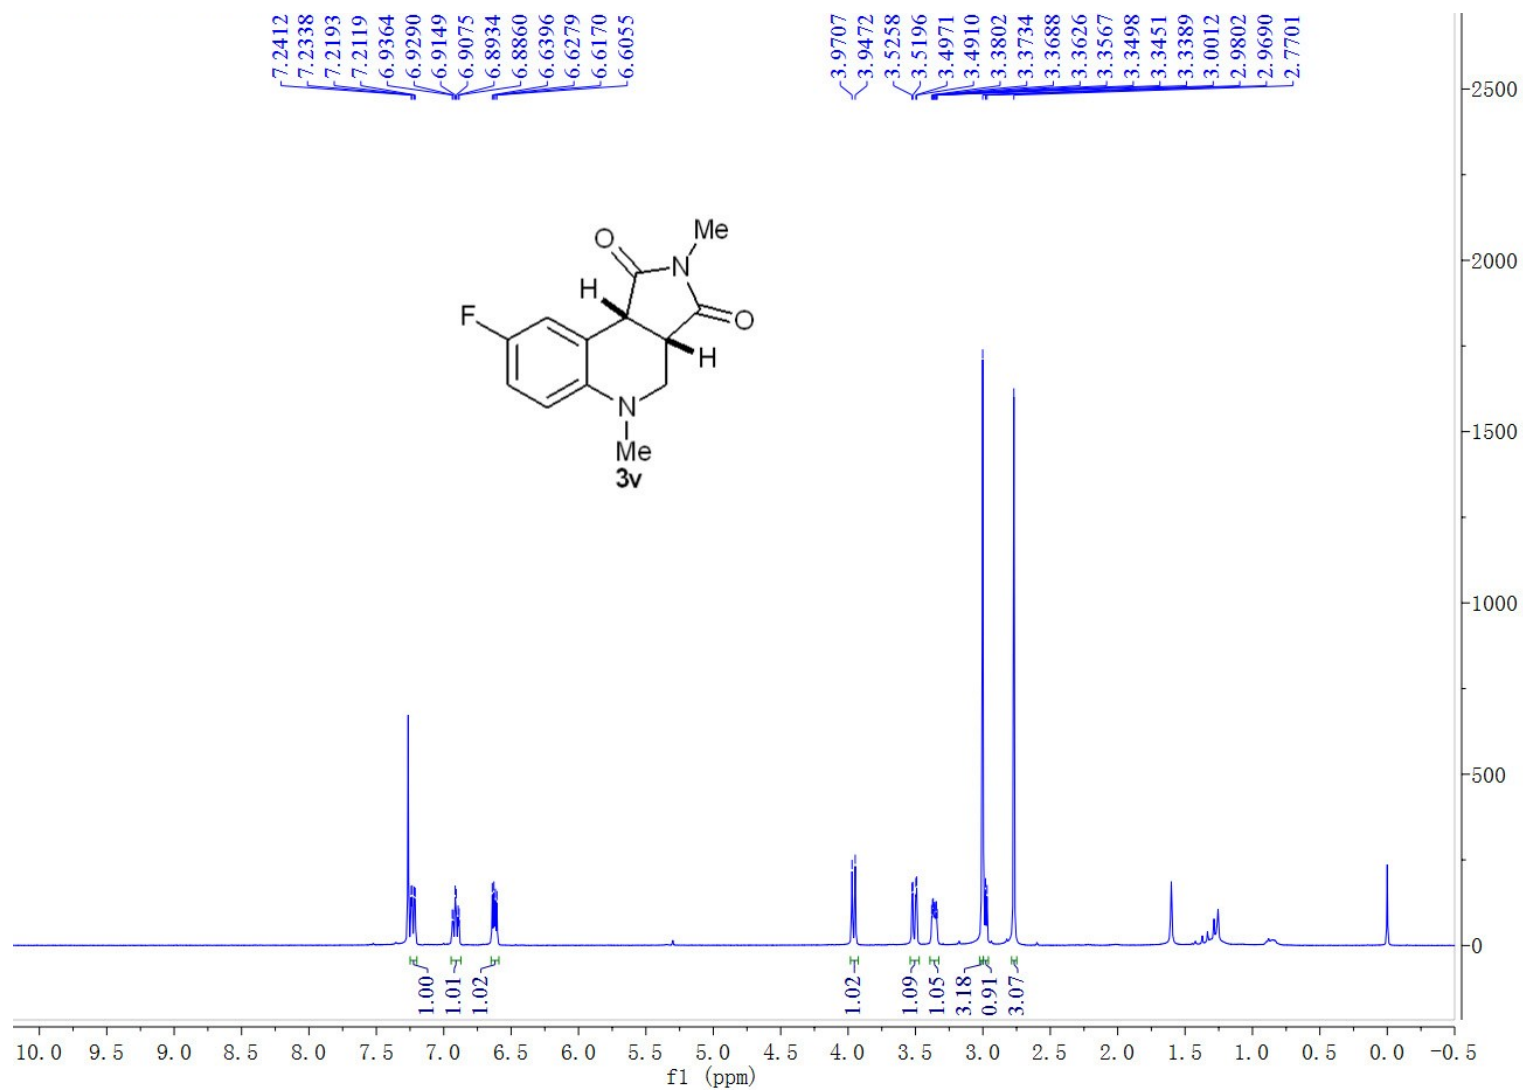

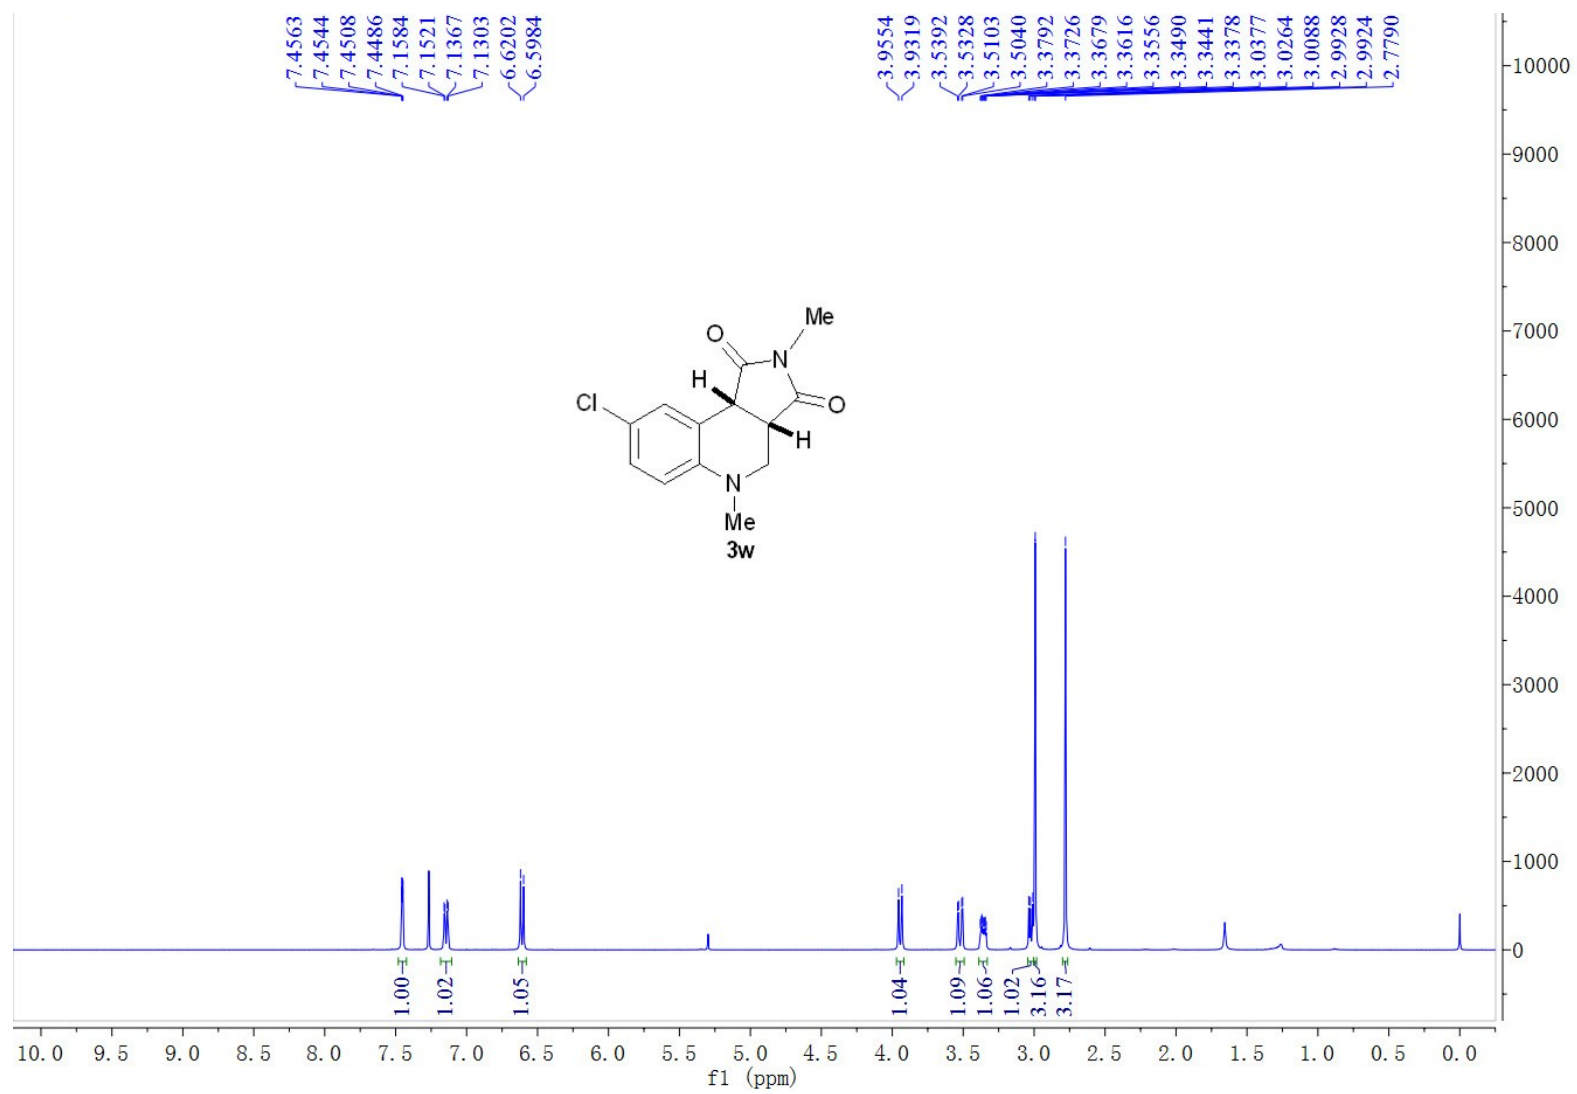

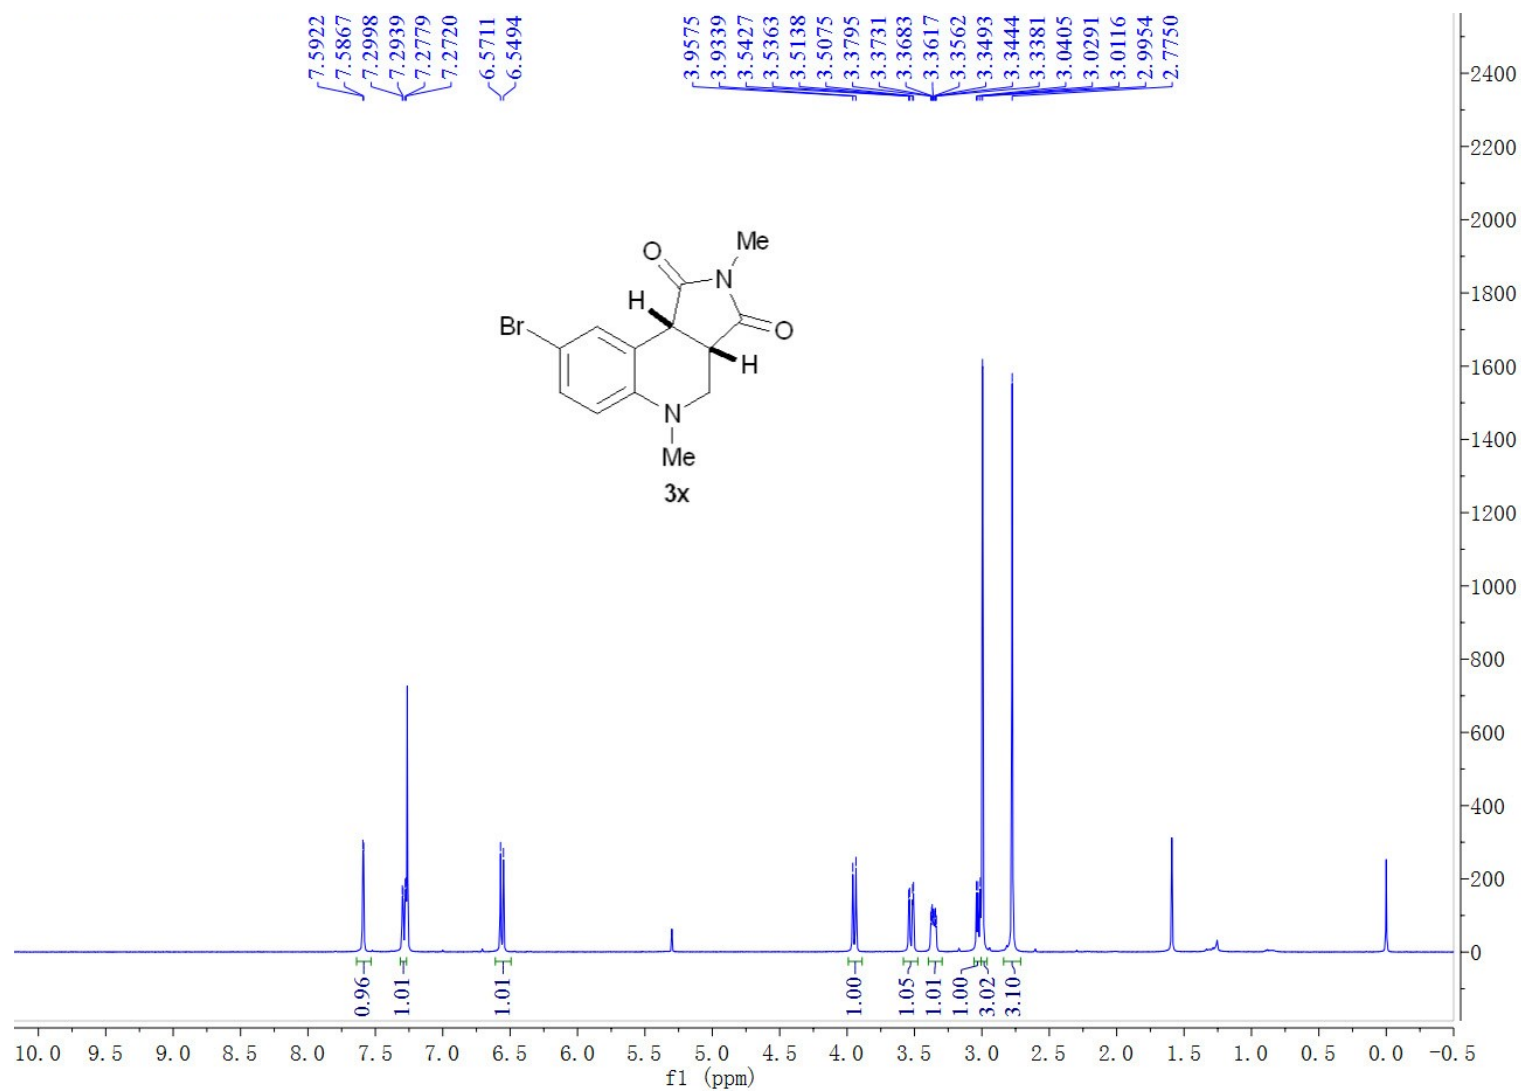

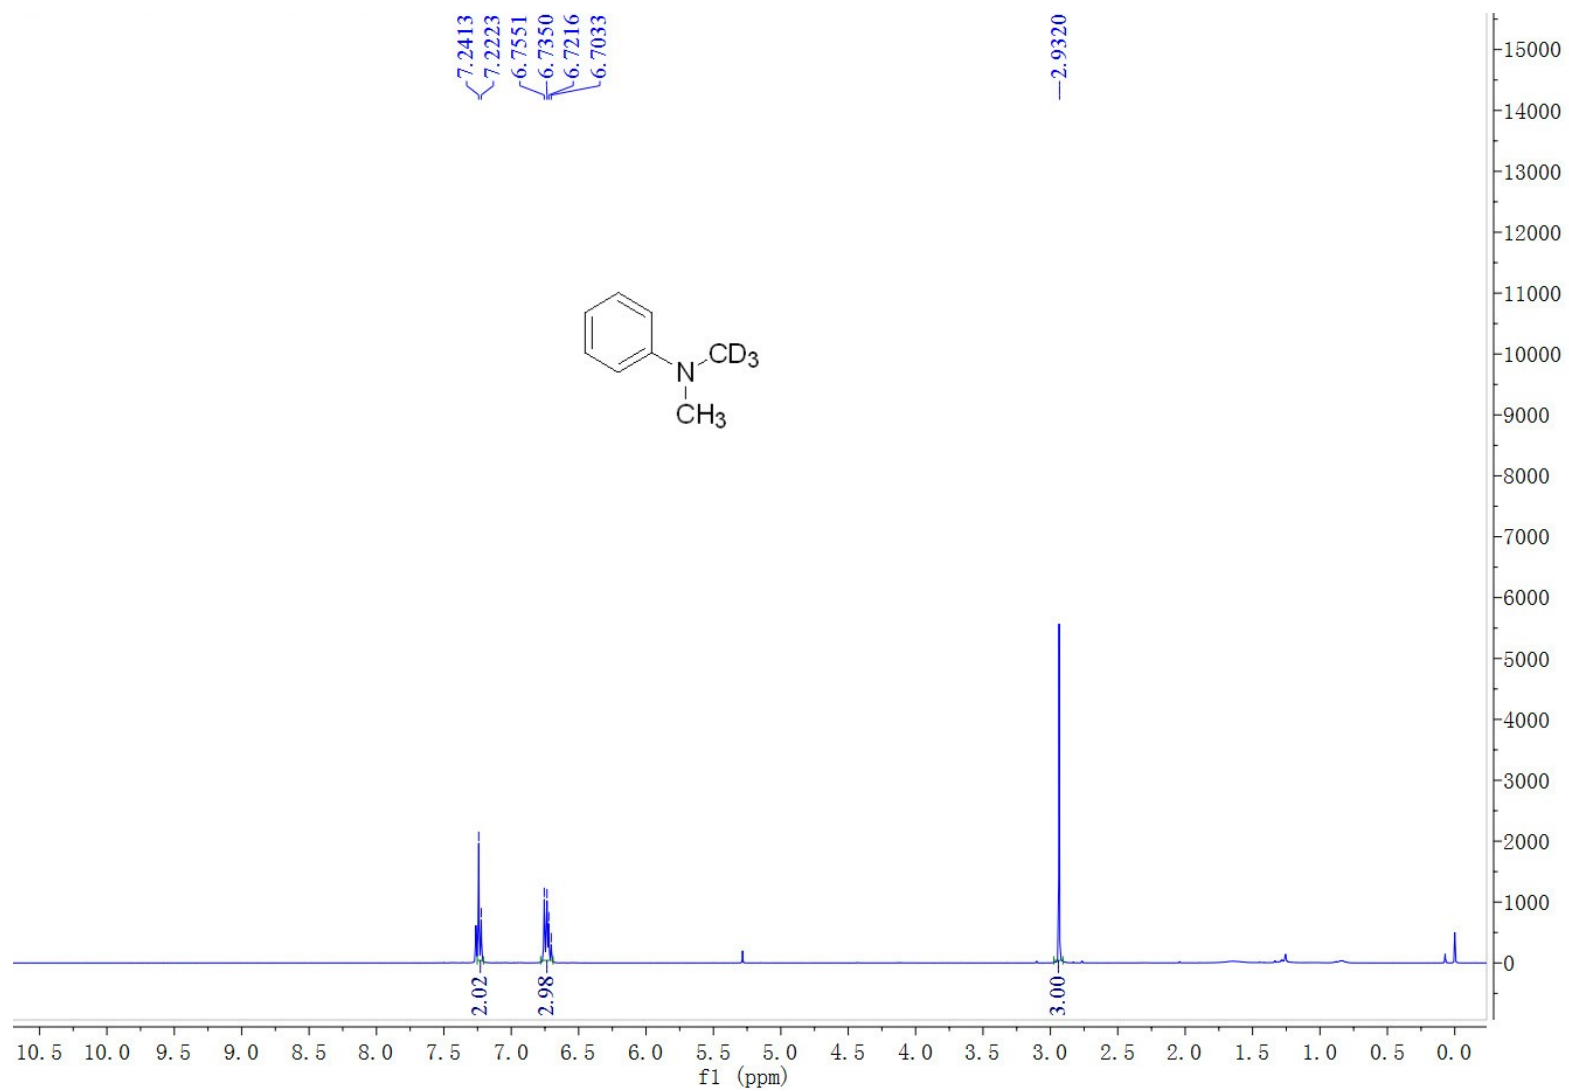

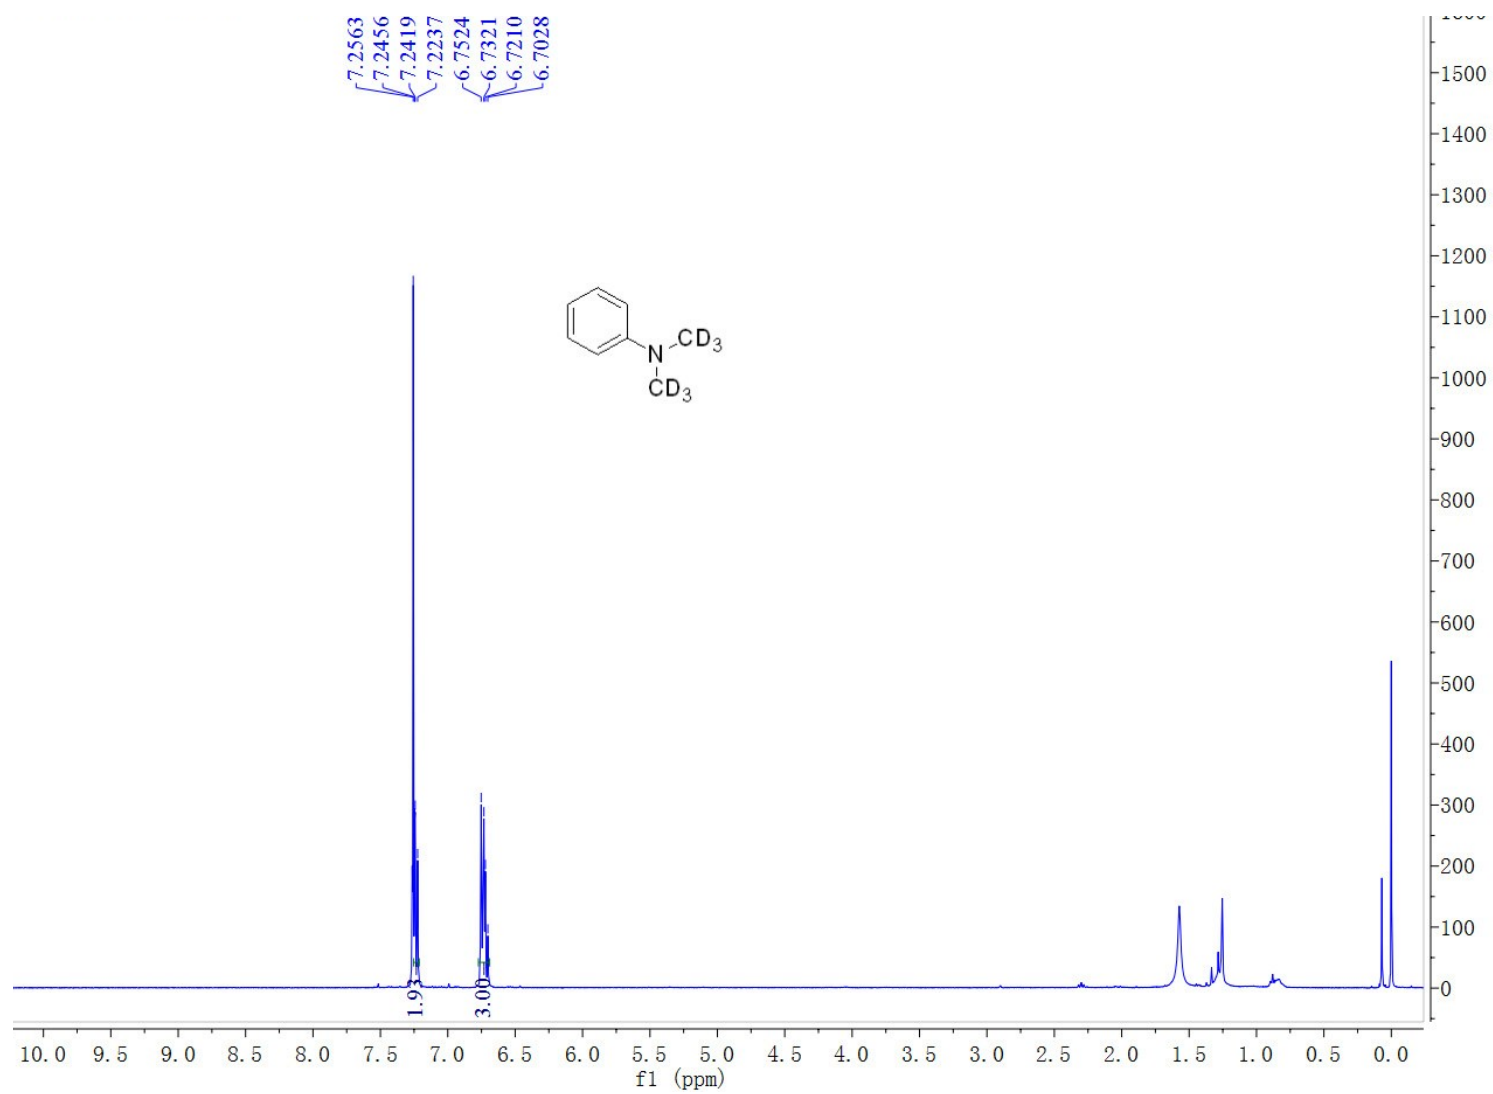

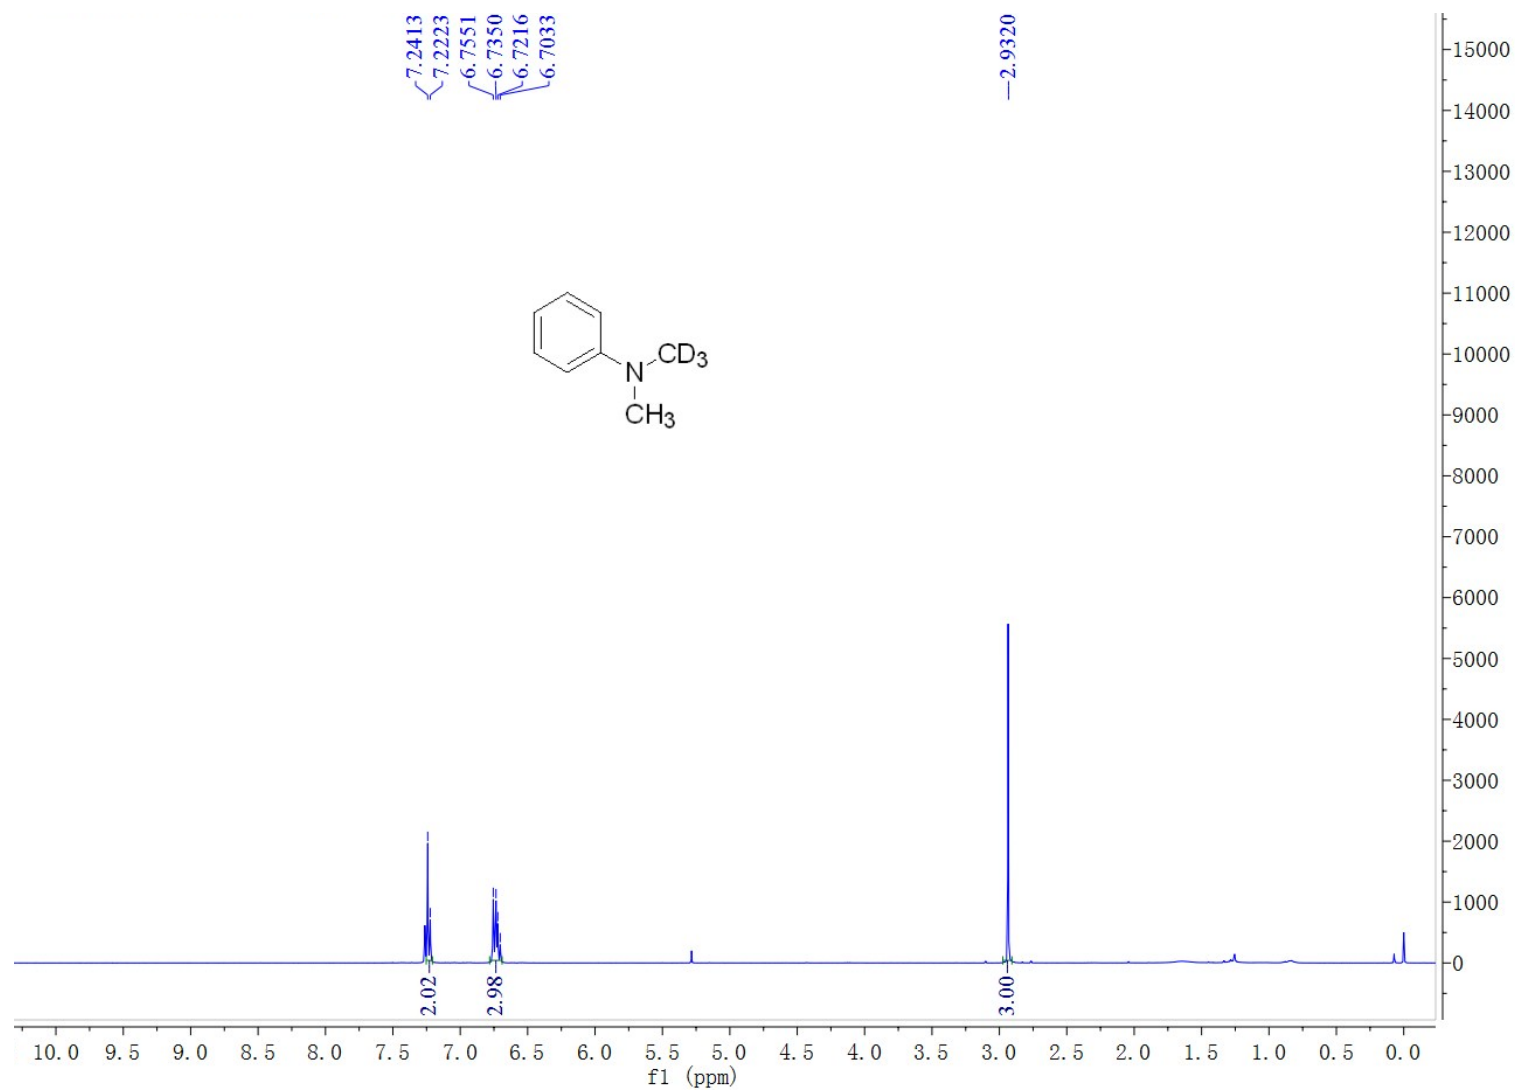

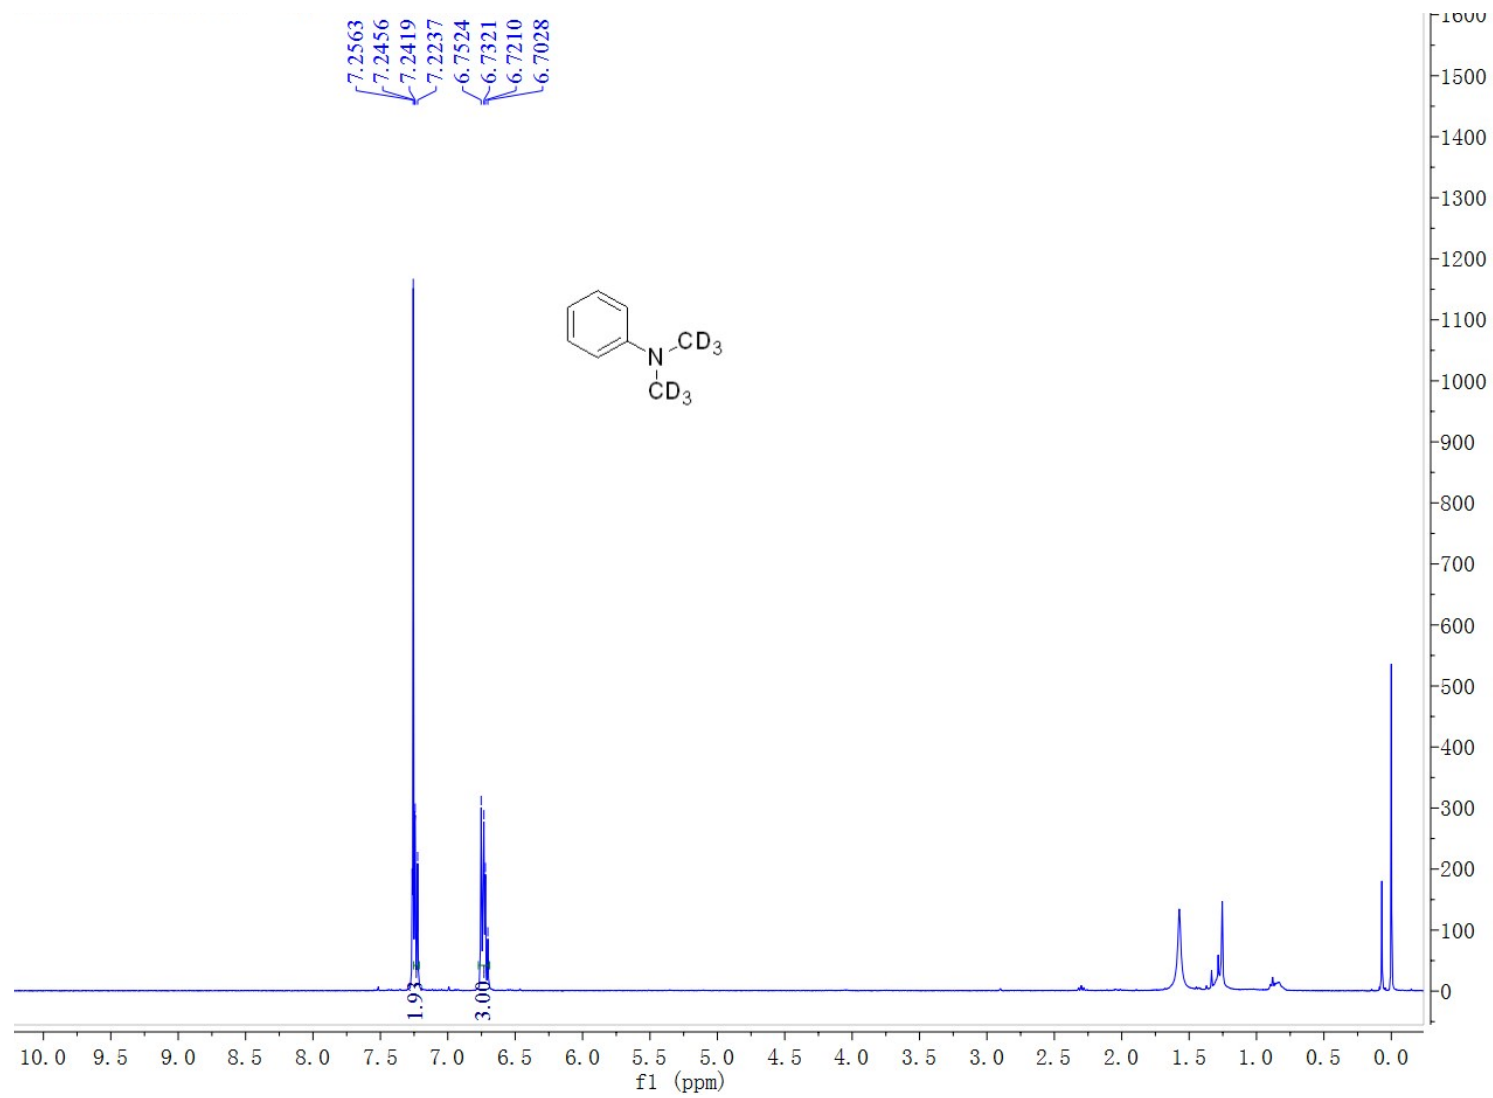

20190618-3b 33 (0.152)

1: TOF MS ES+  
9.17e6

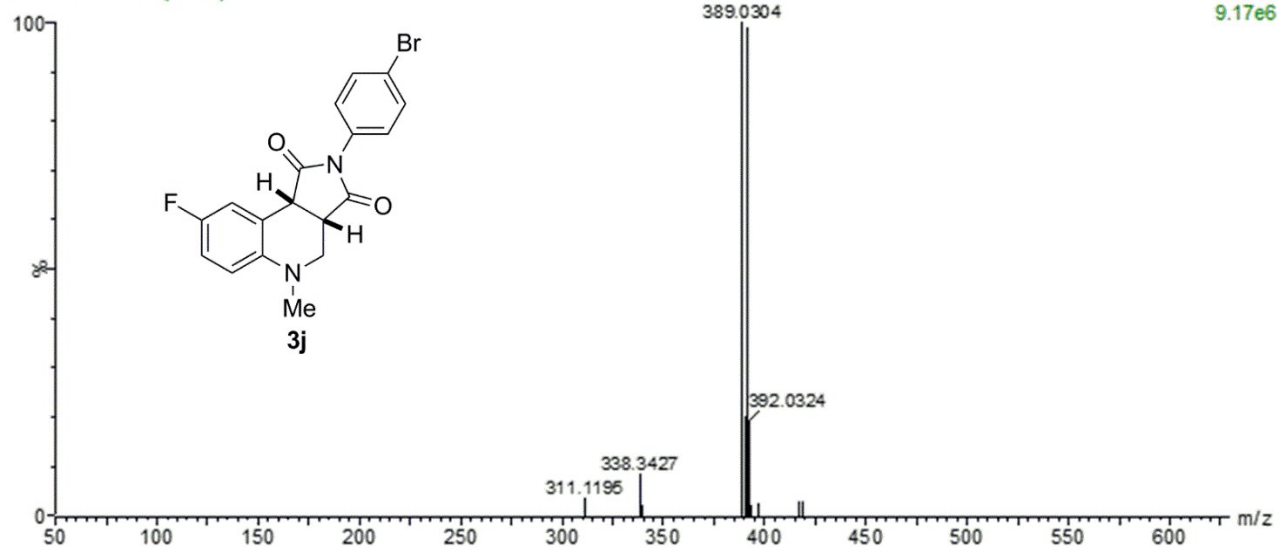

20190618-2b 35 (0.160)

1: TOF MS ES+  
1.28e6

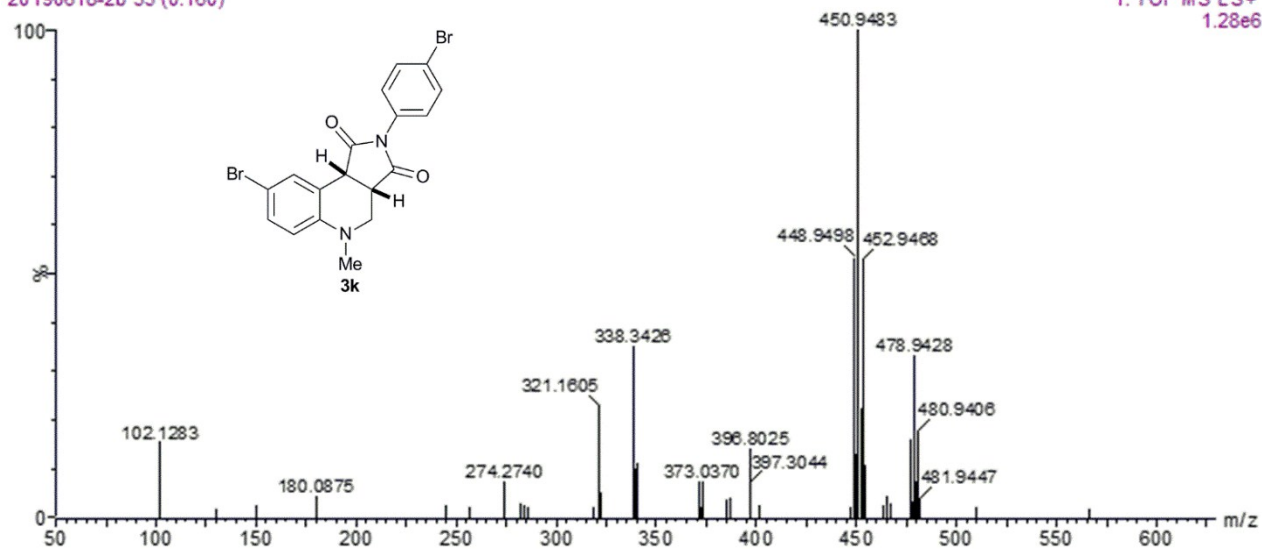

20190618-1b 43 (0.190)

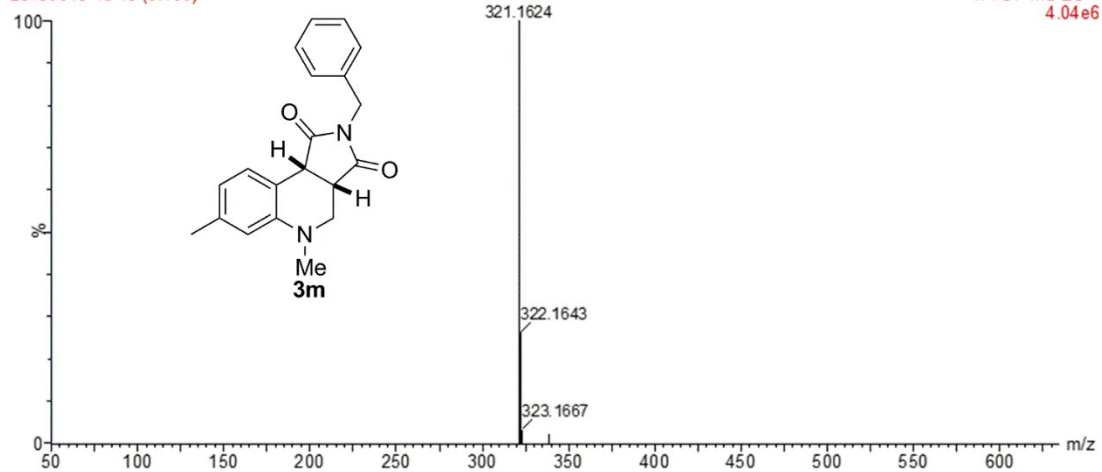

1: TOF MSES+  
4.04e6

20190618-4b 34 (0.156)

1: TOF MS ES+  
4.18e7

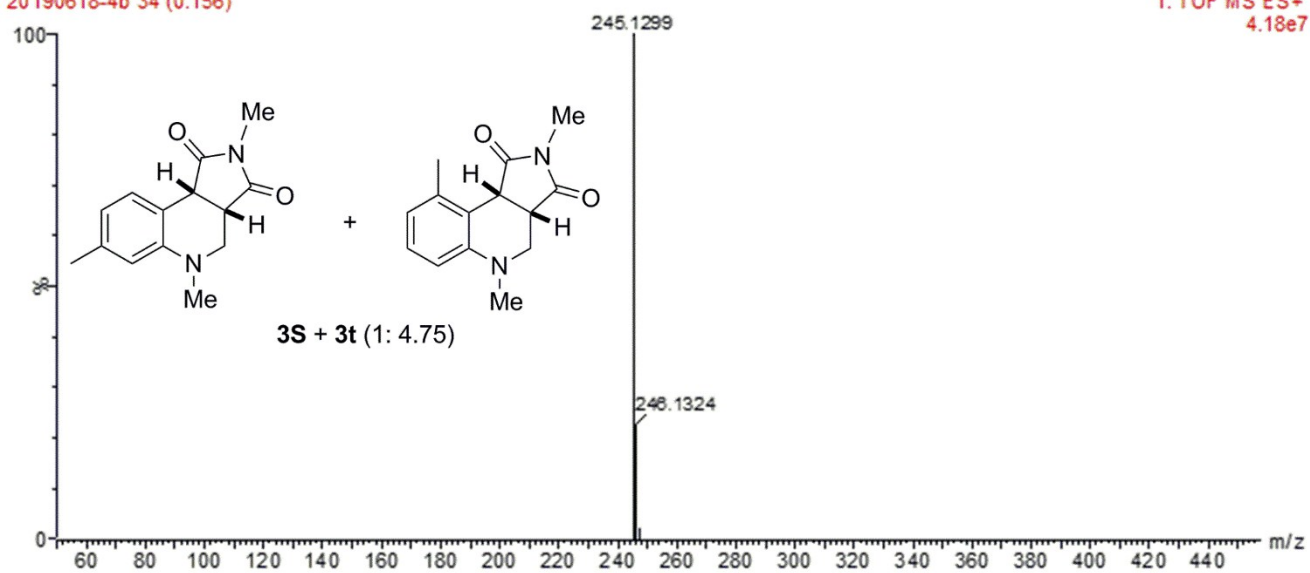

Supplement: c9ob01946d1.pdf [file c9ob01946d1.pdf]
